# 1 Clofoctol inhibits SARS-CoV-2 replication and reduces lung pathology in mice

2  
3 Sandrine Belouzard<sup>1</sup>, Arnaud Machelart<sup>1,6</sup>, Valentin Sencio<sup>1,6</sup>, Thibaut Vausselin<sup>1,2,6</sup>, Eik  
4 Hoffmann<sup>1</sup>, Nathalie Deboosere<sup>1,3</sup>, Yves Rouillé<sup>1</sup>, Lowiese Desmarests<sup>1</sup>, Karin Séron<sup>1</sup>, Adeline  
5 Danneels<sup>1</sup>, Cyril Robil<sup>1</sup>, Loïc Belloy<sup>2</sup>, Camille Moreau<sup>2</sup>, Catherine Piveteau<sup>4</sup>, Alexandre Biela<sup>4</sup>,  
6 Alexandre Vandeputte<sup>1,3</sup>, Séverine Heumel<sup>1</sup>, Lucie Deruyter<sup>1</sup>, Julie Dumont<sup>3,4</sup>, Florence  
7 Leroux<sup>3,4</sup>, Ilka Engelmann<sup>5</sup>, Enagnon Kazali Alidjinou<sup>5</sup>, Didier Hober<sup>5</sup>, Priscille Brodin<sup>1,3,7</sup>,  
8 Terence Beghyn<sup>2,7</sup>, François Trottein<sup>1,7</sup>, Benoît Déprez<sup>3,4,7\*</sup>, Jean Dubuisson<sup>1,7\*</sup>

9  
10  
11 <sup>1</sup>Univ Lille, CNRS, INSERM, CHU Lille, Institut Pasteur de Lille, U1019-UMR 9017-CIIL-Center  
12 for Infection and Immunity of Lille, Lille, France

13 <sup>2</sup>APTEEUS, Campus Pasteur Lille, 1 rue du Professeur Calmette, Lille, France

14 <sup>3</sup>Univ. Lille, CNRS, Inserm, CHU Lille, Institut Pasteur de Lille, US 41 - UMS 2014 - PLBS, F-  
15 59000 Lille, France

16 <sup>4</sup>Univ Lille, Inserm, Institut Pasteur de Lille, U1177-Drugs and Molecules for Living Systems,  
17 Lille, France

18 <sup>5</sup>Univ Lille, CHU Lille, Laboratoire de Virologie-ULR3610, Lille, France

19 <sup>6</sup>These authors contributed equally

20 <sup>7</sup>Equally contributing senior authors

21 \*corresponding authors: [jean.dubuisson@ibl.cnrs.fr](mailto:jean.dubuisson@ibl.cnrs.fr), [benoit.deprez@univ-lille.fr](mailto:benoit.deprez@univ-lille.fr)

## 22 23 **Summary**

24 Antivirals targeting SARS-CoV-2 are sorely needed. In this study, we screened a library of drug  
25 compounds and identified clofoctol as an antiviral against SARS-CoV-2. We further  
26 demonstrated that, in vivo, this compound reduces inflammatory gene expression and lowers  
27 pulmonary pathology.

## 28 29 **Abstract**

30 Drug repurposing has the advantage of shortening regulatory preclinical development steps.  
31 Here, we screened a library of drug compounds, already registered in one or several  
32 geographical areas, to identify those exhibiting antiviral activity against SARS-CoV-2 with  
33 relevant potency. Of the 1,942 compounds tested, 21 exhibited a substantial antiviral activity in  
34 Vero-81 cells. Among them, clofoctol, an antibacterial drug used for the treatment of bacterial  
35 respiratory tract infections, was further investigated due to favorable safety profile and  
36 pharmacokinetic properties. Notably, the peak concentration of clofoctol that can be achieved in

1 human lungs is more than 20 times higher than its  $IC_{50}$  measured against SARS-CoV-2 in  
2 human pulmonary cells. This compound inhibits SARS-CoV-2 at a post-entry step. Lastly,  
3 therapeutic treatment of human ACE2 receptor transgenic mice decreased viral load, reduced  
4 inflammatory gene expression and lowered pulmonary pathology. Altogether, these data strongly  
5 support clofoctol as a therapeutic candidate for the treatment of COVID-19 patients.

6  
7

## 8 **Introduction**

9 The coronavirus disease 2019 (COVID-19) is having a catastrophic impact on human health as  
10 well as on the global economy, and it will continue to affect our lives for years to come (Arthi and  
11 Parman, 2021). This extraordinary situation led to the rapid development of safe and effective  
12 vaccines that have now been deployed at unprecedented scale. While COVID-19 vaccines have  
13 demonstrated their essential role in the control of the pandemic, we still lack affordable efficient  
14 therapies against SARS-CoV-2. Antivirals are indeed urgently needed to treat COVID-19  
15 patients who have not yet been vaccinated and as a therapeutic approach to treat vaccinated  
16 people poorly protected due to waning immunity. Repurposing clinically evaluated drugs can  
17 potentially offer a fast track for the rapid deployment of treatments for this kind of emerging  
18 infectious disease. However, the first attempts of targeted repurposing strategies to treat  
19 COVID-19 patients have led to disappointing results (WHO Solidarity Trial Consortium et al.,  
20 2021). As an alternative approach, large-scale screening of clinically approved drugs through a  
21 carefully designed evaluation cascade may identify additional unanticipated therapeutic options  
22 that can be positioned for accelerated clinical evaluation (Jeon et al., 2020; Riva et al., 2020;  
23 Yuan et al., 2021). Here, we developed a high-content screen (HCS) using the Apteeus drug  
24 library (TEELibrary®), a comprehensive collection of 1,942 approved drugs, to identify molecules  
25 that exhibit antiviral activity against SARS-CoV-2. Clofoctol was selected based on its antiviral  
26 potency associated with favorable pharmacokinetic properties in human. Its further validation in  
27 a small-animal model makes it a promising candidate treatment for clinical evaluation in COVID-  
28 19 patients.

29

## 30 **Results**

### 31 **HCS screening of a library of approved drugs**

32 The screen was performed in Vero-81 cells, an African green monkey kidney cell line highly  
33 permissive to SARS-CoV-2 infection (Matsuyama et al., 2020). The read out was based on the  
34 cytopathic effect (CPE) of the virus as measured by propidium iodide (PI) incorporation into the

1 nuclei of dying cells and cell quantification by nuclei staining with Hoechst 33342  
2 (Supplementary Fig. 1a, Supplementary Table 1). Assay parameters, including cell seeding  
3 density, multiplicity of infection (MOI) and time points, were optimized in Vero-81 cells by  
4 measuring virus-induced CPE in a 384-well format.

5 To assess reproducibility of the optimized assay in a HCS configuration, we initially evaluated  
6 the effect of chloroquine (CQ), previously reported to have antiviral activity against SARS-CoV-2  
7 in Vero Cells (Wang et al., 2020). This compound is an effective inhibitor of coronavirus entry  
8 into host cells through the endocytic pathway, however because of its lack of effect on the  
9 TMPRSS2-mediated pathway, chloroquine has been shown to be ineffective to treat COVID-19  
10 patients. Nonetheless, this enabled us to benchmark the dynamic range of the assay with a  
11 reliable positive control. Robustness was then assessed by calculating the strictly standardized  
12 mean difference (SSMD) of each plate, with a mean of 6.87 ( $\pm 2.19$ ) for all plates (Supplementary  
13 Fig. 1b). We then used this experimental design to screen our drug library (Fig. 1a) using a non-  
14 cytotoxicity concentration of 15  $\mu\text{M}$  for most compounds in the presence of low viral input (MOI =  
15 0.01), in order to capture multicycle replication with an extended end-point measurement at 72h  
16 post-infection (Riva et al., 2020). Indeed, at this time-point, a major cytopathic effect could be  
17 observed with a strong decrease in cell number at the low MOI used in our assay. For each  
18 compound, a Robust Z-score normalized to the median of each plate was calculated for both  
19 SARS-CoV-2-induced CPE related readouts (PI measurement and Hoechst 33342 staining).

20 Compounds exhibiting the highest levels of CPE inhibition were initially selected. Of the 1,942  
21 tested compounds, 57 were identified to significantly decrease PI incorporation (robust Z-score <  
22 -3) or to increase the number of cells as measured with Hoechst 33342 staining (robust Z-score  
23 > 3) (Supplementary Table 2). Among these compounds, CQ, nitazoxanide, amodiaquine,  
24 triflupromazine and niclosamide were previously identified in other studies (Jeon et al., 2020;  
25 Wang et al., 2020; Lu et al., 2021; Weston et al., 2020) (Fig. 1b). It is worth noting that the  
26 majority of the selected compounds are basic molecules like CQ, amodiaquine, fluphenazine,  
27 trifluoperazine and triflupromazine (Fig. 1c). Such compounds are known to affect the  
28 endosomal internalization pathway by accumulating inside the endosomes, modifying their pH  
29 and therefore inhibiting SARS-CoV-2 by blocking its endosomal entry.

30 We assessed the activity of the 57 identified hits in dose-response curve (DRC) analyses using  
31 the same setting as in the screen (Supplementary Table 2). Of these, 21 showed dose-related  
32 inhibition of the PI incorporation upon infection (N=2).

33 Coronaviruses, including SARS-CoV-2, can use two different routes to enter their target cells.  
34 They either enter cells by endocytosis and release their genome into the cytosol after fusion of  
35 their envelope with an endosomal membrane, or they fuse their envelope directly with the

1 plasma membrane. This latter entry route is triggered by the cell surface protease TMPRSS2  
2 which is not expressed in Vero-81 cells (Hoffmann et al., 2020). Previously identified anti-SARS-  
3 CoV-2 compounds, like CQ and hydroxy-CQ, were shown to only block the endocytic entry route  
4 (Hoffmann et al., 2020). An additional validation on Vero-81-TMPRSS2 cells was therefore  
5 performed to discard compounds that only block the endocytic route of SARS-CoV-2 entry.  
6 Of the 21 molecules validated twice in Vero-81 cells, the most interesting ones were retained  
7 based on a preliminary evaluation of their risk/benefit ratio in the clinic. This evaluation included  
8 a comparison of the *in vitro* potency to plasma exposure at the approved dose. Therefore, only 8  
9 out of the 21 compounds were tested in Vero-81-TMPRSS2 cells (Supplementary Table 2). Only  
10 3 of them exhibited a dose-dependent antiviral activity against SARS-CoV-2 in the presence or  
11 absence of TMPRSS2, indicating an antiviral effect irrespective of the entry route. These three  
12 compounds are perphenazine, nitazoxanide, and a third one, called clofoctol, that was not  
13 reported by others. More importantly, clofoctol is well distributed in tissues, particularly in lungs  
14 where its concentration is twice higher than in plasma (Del Tacca et al., 1987). Altogether, these  
15 observations prompted us to further characterize the anti-SARS-CoV-2 properties of clofoctol.

#### 16 ***In vitro* validation of the antiviral activity of clofoctol**

17 To further confirm the antiviral activity of clofoctol, SARS-CoV-2 genomic replication was  
18 measured by quantitative RT-PCR. In this assay, clofoctol exhibited an  $IC_{50}$  of 12.41  $\mu$ M in Vero-  
19 81 cells and 13.51  $\mu$ M in Vero-81-TMPRSS2 (Fig. 2a). To validate the specificity of its antiviral  
20 activity, its potential cytotoxic effect in cell culture was determined in an MTS viability assay. As  
21 shown in Fig. 2b, after 24h of treatment, no cytotoxic effect was observed at concentrations  
22 below 40  $\mu$ M, indicating that the decreased SARS-CoV-2 replication in the presence of clofoctol  
23 was not due to a cytotoxic effect of the compound. To further characterize the antiviral activity of  
24 clofoctol, its effect on the production of infectious progeny virions was also quantified. As shown  
25 in Fig. 2c, a dose-dependent decrease of infectious virus production was observed in these  
26 experimental conditions, confirming the antiviral effect of clofoctol against SARS-CoV-2 with an  
27  $IC_{50}$  of 9.3  $\mu$ M and 11.59  $\mu$ M in Vero-81 and Vero-81-TMPRSS2 cells, respectively.

28 Vero cells are the cells of choice to efficiently grow SARS-CoV-2 in culture and therefore to  
29 screen large libraries of compounds for rapid identification of antivirals. However, as these cells  
30 are from monkey origin, the human cell line Calu-3, derived from a lung adenocarcinoma,  
31 previously shown to be permissive to SARS-CoV-2 (Hoffmann et al., 2020) was also used to  
32 validate our observations. As shown in Fig. 2d, a dose-dependent decrease of viral RNA  
33 production was also observed in infected Calu-3 cells treated with clofoctol, at concentrations  
34 that did not exhibit a cytotoxic effect (Fig. 2b). In this cell line, clofoctol exhibited an  $IC_{50}$  of 7.9  
35  $\mu$ M.

## 1 **Clofoctol inhibits the translation of SARS-CoV-2 viral RNAs**

2 The life cycle of a virus can be divided into three major steps: (1) entry, (2) translation/replication  
3 and (3) assembly/release. To determine at which step clofoctol inhibits SARS-CoV-2, the  
4 compound was added either before infection, during virus entry, post-inoculation or throughout  
5 all the steps. Remdesivir, an inhibitor of the viral polymerase (Lo et al., 2020), and CQ were  
6 used as control antivirals affecting viral replication or entry, respectively. As shown in Fig. 3a,  
7 remdesivir inhibited infection only when added after the entry step, whereas CQ was only  
8 efficient when added at the entry step. Clofoctol inhibited SARS-CoV-2 mainly at the post-  
9 inoculation step, although it had also a mild effect at the entry step. These data suggest that the  
10 translation/replication step is likely the major target of clofoctol. To further characterize the post-  
11 entry inhibitory effect of clofoctol, a time-of-addition experiment was also performed in parallel  
12 with clofoctol, remdesivir and CQ. In this experiment, the compounds were added before  
13 infection or at different times post-infection. As shown in Fig. 3b, CQ was only efficient when  
14 added prior to infection or during the inoculation step, whereas remdesivir and clofoctol  
15 remained effective when added up to three or four hours post-inoculation, respectively. To  
16 further exclude a potential effect of clofoctol on SARS-CoV-2 entry, we used retroviral particles  
17 pseudotyped with the SARS-CoV-2 Spike (S) glycoprotein (SARS2pp). These are retroviral  
18 cores carrying SARS-CoV-2 S glycoprotein in their envelope and a minigenome containing a  
19 luciferase reporter gene. In this context, only the early steps of the viral life cycle (i.e., virus  
20 interaction with receptors, uptake, and fusion) are SARS-CoV-2 specific, whereas all later steps  
21 are dependent on retroviral nucleocapsid elements. Clofoctol did not show any inhibitory effect  
22 on SARS2pp entry (Fig. 3c), indicating that it does not inhibit the cellular entry of SARS-CoV-2.  
23 Of note, clofoctol was also active against another coronavirus which is mildly pathogenic, HCoV-  
24 229E, and more importantly against the D614G, the B.1.1.7 and the B.1.351 variants of SARS-  
25 CoV-2 (Supplementary Fig. 2), indicating that its antiviral activity is conserved across different  
26 clades of SARS-CoV-2 and coronavirus species.

27 For positive-stranded RNA viruses like coronaviruses, translation of the viral genome is the step  
28 that immediately follows virus entry. To determine whether this step is affected by clofoctol  
29 treatment, we used a reporter construct expressing the *Renilla* luciferase introduced between  
30 the 5'-UTR and the 3'-UTR of the SARS-CoV-2 genomic RNA. As a control, we used a  
31 bicistronic construct containing the *Firefly* luciferase sequence under the control of a eukaryotic  
32 mRNA 5' cap structure, followed by the *Renilla* luciferase sequence under the translational  
33 control of the hepatitis C virus (HCV) IRES (Goueslain et al., 2010). To avoid a potential effect of  
34 clofoctol on the transcription of the reporters from plasmid DNA, *in vitro*-transcribed capped  
35 RNAs were transfected by electroporation into Vero-81 or Huh-7 cells. After 8h of clofoctol  
36 treatment, a dose-dependent inhibition of luciferase activity was observed with the SARS-CoV-2

1 UTRs-based construct in Vero-81 and Huh-7 cells, but not for the control bicistronic construct  
2 (Fig. 3d), indicating that clofoctol specifically inhibits the translation of an mRNA containing the  
3 UTRs of the SARS-CoV-2. This suggests that clofoctol has the potential to inhibit the translation  
4 of genomic as well as sub-genomic SARS-CoV-2 RNAs.

#### 5 **Clofoctol inhibits SARS-CoV-2 replication *in vivo* and lowers inflammation in lungs**

6 To investigate the potential antiviral activity of clofoctol against SARS-CoV-2 *in vivo*, we took  
7 advantage of transgenic C57BL/6 mice expressing the human ACE2 receptor (K18-hACE2  
8 mice) (Golden et al., 2020). Before testing the potential antiviral activity of clofoctol,  
9 pharmacokinetic experiments were performed in female C57BL/6 mice. To this end, clofoctol  
10 was injected intraperitoneally (i.p.) at 62.5 mg/kg to reach a lung concentration close to that  
11 achieved in humans at approved posology. Mice were sacrificed at 30 min, 1h, 2h and 4h after  
12 i.p. administration of clofoctol. As early as 30 min after injection, clofoctol reached  
13 concentrations up to 61  $\mu\text{M}$  in the lungs and remained above this level for almost 4h (Fig. 4a, *left*  
14 *panel*), whereas it remained at a concentration seven times lower in the plasma. According to its  
15 expected half-life in the lungs, clofoctol concentration was anticipated to remain above its *in vitro*  
16 measured  $\text{IC}_{50}$  ( $\text{IC}_{50} \sim 10\mu\text{M}$ ) for more than 7 consecutive hours. It was then decided to treat the  
17 mice twice daily to maintain a lung concentration close to 60  $\mu\text{M}$ . In this setting, clofoctol  
18 concentration reached 67  $\mu\text{M}$  in the lungs, 1h after the fourth administration (Fig. 4a, *right*  
19 *panel*).

20 Because of this favorable pharmacokinetic profile in mice, we decided to test clofoctol in K18-  
21 hACE2 transgenic mice. Female mice were inoculated intranasally (i.n.) with a lethal dose ( $5 \times 10^2$   
22  $\text{TCID}_{50}$ ) of a clinical SARS-CoV-2 isolate. The animals were then injected intraperitoneally with  
23 clofoctol at 1h and 8h post-infection. This treatment was repeated the day after infection and  
24 some of the mice were sacrificed at day 2 post-inoculation (Fig. 4b, *left panel*). As compared to  
25 untreated animals, the infectious viral load detected in the lungs of clofoctol-treated mice was  
26 reduced by more than 1.1  $\log_{10}$  at day 2 post-infection (Fig. 4b, *middle panel*). Analysis of viral  
27 RNA yields by RT-qPCR confirmed the reduced viral load in clofoctol-treated animals (Fig. 4b,  
28 *right panel*). Male K18-hACE2 transgenic mice are more susceptible than females to SARS-  
29 CoV-2 infection (Golden et al., 2020). Clofoctol treatment similarly reduced the viral load in the  
30 lungs of male K18-hACE2 transgenic mice (Supplementary Fig. 3a).

31 We then investigated whether the decrease in viral load would have positive effects on lung  
32 inflammation. Remarkably, the expression of transcripts encoding IL-6,  $\text{TNF}\alpha$ , IL12p40,  $\text{IFN}\beta$ ,  
33  $\text{IFN}\gamma$  and the interferon-stimulated genes (ISG) Mx1, Ifi44 and ISG15 was markedly reduced in  
34 clofoctol-treated mice, in contrast with that of IL-17A (Fig. 4c). Similar results were also  
35 observed in male K18-hACE2 transgenic mice (Supplementary Fig. 3b). At day 4 post-



1 inoculation, relative to controls, mice treated during the first 2 days with clofoctol still showed a  
2 lower viral load and a decreased expression of transcripts encoding inflammatory markers  
3 (supplementary Fig. 4a, Fig. 4b and data not shown). At this time point, SARS-CoV-2 infection  
4 was associated with reduced expression of genes encoding markers of epithelial barrier  
5 function, including the tight-junction protein Zonula Occludens-1 (ZO-1) and occludin.  
6 Interestingly, the drop of these transcript levels induced by SARS-CoV-2 infection was  
7 significantly reduced in clofoctol-treated animals (supplementary Fig. 4c).

8 Lastly, we assessed the impact of clofoctol treatment on lung pathology at day 4 post-infection.  
9 In vehicle-treated animals, a mild multifocal broncho-interstitial pneumonia was observed (Fig.  
10 4d, *upper left panel*). Signs of moderate inflammation, with the presence of neutrophils,  
11 macrophages and a few lymphocytes, were observed within alveolar lumens, inter-alveolar  
12 septa, and perivascular spaces which was accompanied by minimal perivascular edema (Fig.  
13 4d, *lower left panel*). Slight vascular congestion and discrete intra-alveolar hemorrhages were  
14 also detected (not shown). In stark contrast, only a minimal interstitial inflammation was  
15 observed in clofoctol-treated mice (Fig. 4d, *upper right panel*), with a limited presence of  
16 macrophages and lymphocytes within inter-alveolar septa and little vascular congestion (Fig. 4d,  
17 *lower right panel*). We conclude that, at doses that produce lung concentrations close to those  
18 observed in human patients treated at the approved dose, clofoctol treatment in mice just after  
19 infection lowers SARS-CoV-2 replication and reduces lung pathological features associated with  
20 this viral infection.

## 21 **Discussion**

22 In this study, we report the high-throughput screening of ~2,000 drugs, approved for human use,  
23 for their potential activity against SARS-CoV-2. Our data identify clofoctol as a promising  
24 antiviral candidate for the treatment of COVID-19 patients. This antibacterial drug was  
25 developed in the late 1970s. Its efficacy has been demonstrated for the treatment of  
26 *Streptococcus pneumoniae* - the leading cause of bacterial pneumonia worldwide - and  
27 *Staphylococcus aureus* (Danesi and Del Tacca, 1985; Ghilardi and Casani, 1985). The drug was  
28 marketed in France until 2005 under the trade name Octofène® and is still prescribed in Italy  
29 under the trademark GramPlus®. Mechanistically, clofoctol inhibits bacterial cell wall synthesis  
30 and induces membrane permeabilization (Yablonsky, 1983; Yablonsky and Simonnet, 1982).  
31 Along with its bactericidal activity, clofoctol was recently shown to also inhibit protein translation  
32 and to impair tumor cell growth (Hu et al., 2019; Wang et al., 2014a). As such, clofoctol could be  
33 useful to treat some cancers and possibly other diseases (Bailly and Vergoten, 2021).

34 Among the 2,000 drugs tested, clofoctol emerged as the most promising compound to inhibit  
35 SARS-CoV-2 replication in our experimental settings. Our data show that it can contribute to

1 inhibition of SARS-CoV-2 propagation by blocking translation of viral RNA. However, we cannot  
2 exclude other effects of clofoctol on SARS-CoV-2 replication. The inhibition of translation by  
3 clofoctol could be due to the activation of the unfolded protein response (UPR) pathways.  
4 Clofoctol has indeed been reported to induce endoplasmic reticulum (ER) stress and to activate  
5 all three UPR pathways, i.e. the inositol requiring enzyme 1 (IRE1), the double stranded RNA-  
6 activated PK-like ER kinase (PERK), and the activating transcription factor 6 (ATF6) (Wang et  
7 al., 2014b). Although UPR activation is observed during SARS-CoV-2 infection (Echavarría-  
8 Consuegra et al., 2021), chemical activation of UPR by thapsigargin has been shown to inhibit  
9 coronavirus replication, including SARS-CoV-2 (Shaban et al., 2021). Furthermore, modulating  
10 the PERK-eIF2 $\alpha$  pathway can inhibit the replication of the transmissible gastroenteritis porcine  
11 coronavirus (Xue et al., 2018). Similarly, triggering the UPR with 2-deoxy-D-glucose inhibits the  
12 replication of another coronavirus, the porcine epidemic diarrhea virus (Wang et al., 2014b).  
13 Whether the clofoctol-induced inhibition of SARS-CoV-2 translation is linked to UPR activation  
14 will be the focus of further investigation.

15 Previous pharmacokinetic studies indicate that clofoctol is well absorbed by rectal  
16 administration, and can rapidly expose lung tissues (Del Tacca et al., 1987; Alessandri et al.,  
17 1986). Of interest, as early as 90 minutes after rectal administration, the peak concentration of  
18 clofoctol that can be achieved in human lungs is more than 20 times higher than its IC<sub>50</sub>  
19 measured in Vero-81 cells. In our experimental conditions, clofoctol was also detected in mice  
20 lungs at a peak concentration reaching approximately tenfold its IC<sub>50</sub>. Notably, upon two days of  
21 treatment with doses allometrically similar to those approved for human treatment, its  
22 concentration in the lungs remained far above the IC<sub>50</sub> measured *in vitro*. Importantly, we  
23 demonstrate here that clofoctol treatment decreased the viral load in the lungs and drastically  
24 reduced pulmonary inflammation. These *in vivo* data, as well as the rapid onset of action  
25 expected in human pharmacokinetics, strongly support clofoctol as a therapeutic candidate for  
26 the treatment of COVID-19 patients. An ongoing phase 2/3 placebo controlled clinical trial should  
27 further validate the therapeutic potential of this compound in the early phase of COVID-19.

28 Together with its antiviral effects, clofoctol abrogated lung inflammation. To the best of our  
29 knowledge, the anti-inflammatory effect of clofoctol has never been reported before. Together  
30 with its effect on UPR pathways, clofoctol is known to interact with different targets including (i)  
31 the Cdc7/Dbf4 protein kinase complex, which regulates the initiation of DNA replication and (ii)  
32 the upstream-of-N-Ras protein (UNR), a highly conserved RNA-binding protein known to  
33 regulate gene expression. Of interest, by binding to UNR, clofoctol activates the transcription  
34 factor Kruppel-like factor 13 (KLF13)(Wang et al., 2014a), known as a tumor suppressor gene  
35 and as a regulator of T cell differentiation (Fernandez-Zapico et al., 2011; Jiang et al., 2015).  
36 Whether the UNR/KLF13 pathway triggered by clofoctol plays a role in decreasing inflammation



1 during SARS-CoV-2 infection deserves further investigation. Additional functional studies are  
2 urgently needed to assess the global effect of clofoctol on COVID-19 pathology.

3 In conclusion, the antiviral and anti-inflammatory properties of clofoctol, associated with its  
4 safety profile and unique pharmacokinetics make a strong case for proposing clofoctol as an  
5 affordable therapeutic candidate for the treatment of COVID-19 patients.

6

## 7 **Methods**

8 **Data reporting.** No statistical methods were used to predetermine sample size. Compounds  
9 were spotted in a randomized order on the plates during the primary screen. All the other  
10 experiments were not randomized. Investigators were blinded to allocation during the primary  
11 screen and the corresponding validation, during both assay performance and outcome  
12 assessment. For all the other assays, the investigators were not blinded.

13

14 **Cells and viruses.** Vero-81 cells (ATCC, CCL-81), Vero-E6 cells (ATCC, CRL-1586), Huh-7  
15 cells (Nakabayashi et al., 1982) and HEK293T/17 cells (ATCC, CRL-11268) were grown at 37°C  
16 with 5% CO<sub>2</sub> in Dulbecco's modified eagle medium (DMEM, Gibco) supplemented with 10 %  
17 heat-inactivated fetal bovine serum (FBS, Eurobio). Calu-3 cells (Clinisciences, EP-CL-0054)  
18 were grown in minimum essential medium (Gibco, MEM) supplemented with glutamax (Gibco)  
19 and 10% heat-inactivated FBS.

20 Lentiviral vectors expressing TMPRSS2 were produced by transfection of HEK293T cells with  
21 pTRIP-TMPRSS2, pHCMV-VSVG and HIV gag-pol in the presence of Turbofect (Life  
22 Technologies) according to the manufacturer's instruction. Supernatants were collected at 48h  
23 post-transfection and used to transduce Vero-E6 cells.

24 The BetaCoV/France/IDF0372/2020 strain of SARS-CoV-2 was supplied by the French National  
25 Reference Center for Respiratory Viruses hosted by Institut Pasteur (Paris, France). The hCoV-  
26 19\_IPL\_France strain of SARS-CoV-2 (NCBI MW575140) was also used for *in vivo* experiments.  
27 All SARS-CoV-2 viruses, including the variants B.1.1.7 and B.1.351 were propagated in Vero-E6  
28 cells expressing TMPRSS2 by inoculation at MOI 0.01. Cell supernatant medium was harvested  
29 at 72h post-infection and stored frozen at -80 °C in small aliquots. All experiments were  
30 conducted in a biosafety level 3 (BSL3) laboratory.

31 **Chemical libraries.** The TEELibrary® was built and supplied by APTEEUS company. It was in  
32 its version n°4 and counted 1,942 small organic molecules approved for a use in human and  
33 selected within national and international drug repositories. It is mainly composed of active  
34 pharmaceutical ingredients (>90%) and it covers 85% of the Prestwick FDA approved collection.  
35 All molecules have been dissolved in an appropriate bio-compatible solvent (DMSO or water

1 with adjusted pH), at a concentration compatible with the testing on living cells. The majority of  
2 them are prepared at a 10mM concentration in DMSO. CQ diphosphate was purchased  
3 from Sigma-Aldrich (Dorset, England and St. Louis, MO). CQ diphosphate was diluted to a final  
4 concentration of 10 mM in water. Clofoctol was purchased from Sigma-Aldrich (C2290) or  
5 provided by Chiesi company.

6 **Drug screening assay.** One day prior to infection, Vero-81 cells were seeded in black 384-well  
7  $\mu$ Clear® plates (Greiner Bio-One), at a density of 3,000 cells per well in 30  $\mu$ l DMEM,  
8 supplemented with 10% FBS and 1X Penicillin-Streptomycin solution (Gibco), using MultiDrop  
9 Combi® Reagent dispenser (ThermoFischer Scientific). The next day, compounds from the  
10 TEELibrary® were first dispensed into the 384-well plates, using an Echo 550 Liquid Handler  
11 (Labcyte). To identify the compounds of interest, they were tested at a final compound  
12 concentration that usually does not induce cytotoxicity, most of them at 15  $\mu$ M. On each plate,  
13 five 3-fold serial dilutions of CQ diphosphate ranging from 0.15  $\mu$ M to 15  $\mu$ M were added in six  
14 replicates, as a control compound of viral inhibition (positive controls). Eleven control virus wells  
15 devoid of compound and scattered over the plate, were supplemented with 0.15% DMSO or  
16 0.15% H<sub>2</sub>O (negative controls), respectively. Cells were infected by adding 10  $\mu$ L of SARS-CoV-  
17 2 per well at a MOI of 0.01 in 10% FBS-containing medium, using a Viafill Rapid Reagent  
18 Dispenser (Integra). The plates were then incubated at 37° with 5% CO<sub>2</sub>. At 3 days post-  
19 infection, cells were stained with 10  $\mu$ g/mL Hoechst 33342 dye (Sigma-Aldrich) and 1  $\mu$ g/mL PI  
20 (ThermoFischer Scientific) for 30 min at 37°C for CPE quantification by high-content imaging.

21 **Dose response curves and hit validations.** The selected hits were further validated in a 6-  
22 point dose-response confirmation assay. One day prior to infection, Vero-81 cells were seeded  
23 in 384-well plates, as previously described. The next day, six 3-fold serial dilutions of  
24 compounds (0.15 to 45  $\mu$ M, in duplicate) were first added to the cells. Ten  $\mu$ L of virus diluted in  
25 medium was then added to the wells. On each plate, twenty-six virus control wells distributed  
26 over the plates were supplemented with 0.15% DMSO and H<sub>2</sub>O, respectively. CQ diphosphate  
27 was added as a control compound, at six 3-fold serial dilutions (0.15  $\mu$ M to 45  $\mu$ M, in duplicate).  
28 Plates were incubated for 3 days at 37°C prior to staining and CPE quantification by high-  
29 content imaging.

30 **Image acquisition.** Image acquisitions were performed on a high-resolution automated confocal  
31 microscope (Opera, PerkinElmer) using a 10x air objective for cellular infection assay. Hoechst  
32 33342-stained nuclei were detected using the 405 nm excitation laser (Ex) with a 450/50-nm  
33 emission filter (Em). Red signal, corresponding to PI-stained nuclei from dead cells, was  
34 detected using Ex at 561 nm and Em at 600 nm. A set of 3 fields was collected from each well.

1 **Image-based analysis.** For total cell and dead cell detection, images from the automated  
2 confocal microscope were analyzed using multi-parameter scripts developed using Columbus  
3 system (version 2.3.1; PerkinElmer) (Supplementary Table 1). A segmentation algorithm was  
4 applied to detect nuclei labeled by Hoechst 33342 (blue) and determine total nuclei number.  
5 Briefly, a mask was first determined from input image, using the intensity threshold of Hoechst  
6 dye signal to create a region of interest corresponding to Hoechst-stained population. The nuclei  
7 segmentation was then performed using the algorithm “Find Nuclei”, as described  
8 previously (Song et al., 2017). Morphology properties, as area and roundness, could be used to  
9 exclude smaller objects not corresponding to nuclei. The total number of cells was quantified as  
10 Hoechst-positive nuclei. Red fluorescence signal intensities in the previous selected nuclei were  
11 quantified and used for the selection of PI positive (PI+) and negative (PI-) nuclei. Subsequently,  
12 population of dead (PI+) and viable (PI-) cells were determined. The percentage of PI+ cells was  
13 calculated for each compound to select drugs having an effect on the decrease of cell death,  
14 corresponding to infection or viral replication inhibition.

15 **Dose-response validation in different cell lines.** Vero-81, Vero-81-TMPRSS2 or Calu-3 cells  
16 were infected in duplicates at a MOI of 0.25 in the presence of increasing concentrations of  
17 clofoctol, ranging from 0 to 25  $\mu$ M, and incubated either for 6h (Vero-81 cells) or 24h (Calu-3  
18 cells). Then total RNA was extracted by using the Nucleospin RNA kit (Macherey Nagel) as  
19 recommended by the manufacturer. Genome quantification was performed as described  
20 (Eymieux et al., 2021).

21 **Viral secretion.** Vero-81 and Vero-81-TMPRSS2 cells were infected at a MOI of 0.25 for 1h,  
22 then the cells were rinsed 3 times with PBS and further incubated in the presence of increasing  
23 concentrations of clofoctol for 16h. Each condition was performed in duplicates. Cell  
24 supernatants were collected and viral titer were measured by the TCID<sub>50</sub> method.

25 **Pseudoparticles infection.** Retroviral Murine leukemia virus particle were pseudotyped with the  
26 SARS-CoV-2 Spike (BetaCoV/France/IDF0372/2020 strain) or the glycoprotein of the vesicular  
27 stomatitis virus (VSV-G). Briefly, HEK293T cells were co-transfected with a plasmid encoding  
28 Gag-Pol (pTG-Gag-Pol), a plasmid encoding the envelope glycoprotein and a plasmid containing  
29 a minigenome with a *Firefly* luciferase reporter gene. After 48h of incubation, cell supernatants  
30 were collected, filtered and used to transduce Huh-7 cells expressing human ACE2 in the  
31 presence of increasing concentrations of clofoctol or CQ. Transduced cells were lysed 48h later  
32 and luciferase activity was measured by using the luciferase assay system (Promega).

33 **Time-of-addition experiment.** Vero-81 cells were plated in 24-well plates and infected for 1h at  
34 a MOI of 0.5. Clofoctol, remdesivir or CQ were added to the cells at a concentration of 15  $\mu$ M  
35 every hour starting one hour before inoculation. At 8h post-infection, the cells were lysed in non-

1 reducing Laemmli loading buffer. Proteins were separated onto a 10% SDS-polyacrylamide gel  
2 electrophoresis and transferred on nitrocellulose membranes (Amersham). Membrane-bound N  
3 proteins were detected with a rabbit polyclonal antibody (Novus) and a horseradish peroxidase-  
4 conjugated secondary antibody (Jackson ImmunoResearch). Detection was carried out by  
5 chemoluminescence (Pierce) and signals were quantified by using the gel quantification function  
6 of ImageJ. The experiment was repeated 3 times in duplicates.

7 **Immunofluorescence.** Vero-81 cells were plated onto glass coverslips. The day after, the cells  
8 were infected for 1h with SARS-CoV-2 at a MOI of 0.25. Clofoctol, remdesivir or CQ were added  
9 at 15  $\mu$ M at different steps of the infection. The cells were either incubated 1h before inoculation  
10 (pre-incubation) or during the inoculation and for 1h after virus removal (entry step) or starting 1h  
11 after the inoculation until cell fixation (post-entry). Additional conditions with the compounds  
12 present during the whole experiment were also included as well as controls with DMSO or H<sub>2</sub>O.  
13 Cells were incubated for 16h after infection and fixed with 4% paraformaldehyde. Then, cells  
14 were permeabilized for 5 min with 0.1% Triton X-100 in PBS and blocked for 30 min with 5%  
15 goat serum in PBS. Infected cells were detected by using an anti-dsRNA (J2 monoclonal  
16 antibody, Scicons) diluted in blocking buffer to detect the presence of replicating SARS-CoV-2  
17 virus as previously determined (Eymieux et al., 2021). After a 30-min incubation, cells were  
18 rinsed 3 times for 5 min in PBS and incubated for 30 min with a cyanine 3-conjugated goat anti-  
19 mouse secondary antibody (Jackson ImmunoResearch) and DAPI (4',6-diamidino-2-  
20 phenylindole).

21 The coverslips were rinsed with PBS 3 times for 5 min followed by a final water wash before  
22 mounting on microscope slides in Mowiol 4-88 containing medium. Images acquisitions were  
23 performed with an EVOS M5000 imaging system (Thermo Fischer Scientific) equipped with a  
24 10X objective and light cubes for DAPI and RFP. The total number of cells was determined by  
25 counting the number of nuclei and the number of infected cells was determined by counting  
26 dsRNA-positive cells. The experiment was performed three times.

27 **Viability assay.** Vero cells, Huh-7 cells or Calu-3 cells were plated in 96-well plates and were  
28 then incubated the next day in 100  $\mu$ l of culture medium containing increasing concentrations of  
29 clofoctol for 24h. An MTS [3-(4,5-dimethylthiazol-2-yl)-5-(3-carboxymethoxyphenyl)-2-(4-  
30 sulfophenyl)-2H-tetrazolium]-based viability assay (CellTiter 96 aqueous nonradioactive cell  
31 proliferation assay, Promega) was performed as recommended by the manufacturer. The  
32 absorbance of formazan at 490 nm is detected using an enzyme-linked immunosorbent assay  
33 (ELISA) plate reader (ELx808, BioTek Instruments, Inc.). Each measure was performed in  
34 triplicate.

35 **Analysis of the effect of the drug on translation.** A plasmid containing a synthetic gene  
36 encompassing the 5'-UTR (nucleotides 1-265) and the 3'UTR (nucleotides 29675-29903) of

1 SARS-CoV-2 isolate Wuhan-Hu-1 (Genebank NC\_045512.2) separated by two head-to-tail BbsI  
2 sites was produced by GeneCust. The coding sequence of *Renilla* luciferase amplified by PCR  
3 using primers containing BbsI sites was inserted between both UTRs by ligation of BbsI-  
4 restricted PCR and plasmid. In this way, the coding sequence of the luciferase was inserted  
5 between the UTRs without leaving an extra nucleotide in between. The plasmid was linearized  
6 by NsiI restriction, and the linearized DNA was then used as a template for *in vitro* transcription  
7 with the mMMESSAGE mMACHINE T7 kit from Thermofischer Scientific, as recommended by the  
8 manufacturer. *In vitro*-transcribed capped RNA was delivered to Vero-81 and Huh-7 cells by  
9 electroporation. Cells were cultured for 8h in the presence of increasing concentrations of  
10 clofoctol. *Renilla* luciferase activities were measured with a *Renilla* luciferase assay from  
11 Promega. As a control, we used a bicistronic construct containing the *Firefly* luciferase sequence  
12 under the control of a cap structure, followed by the *Renilla* luciferase under the control of  
13 hepatitis C virus (HCV) IRES. *Firefly* and *Renilla* luciferase activities were measured with a dual-  
14 luciferase reporter assay system from Merck Millipore as previously reported (Goueslain et al.,  
15 2010).

#### 16 **Pharmacokinetic study.**

17 Clofoctol diluted in 1.75% final Kolliphor® RH40 (07076, Sigma) and 1.4% final ethanol in a  
18 sodium chloride solution (0.9%) was used for intraperitoneal (i.p.) injection (62.5 mg/kg in  
19 females and 50 mg/kg in males). The concentration of clofoctol in plasma and lungs was  
20 measured at different time points post-clofoctol injection. Plasma samples and lung tissues were  
21 collected and treated with absolute ethanol, in a ratio of 1 to 10 and 1 to 50, respectively. Lung  
22 tissues were homogenized with a mechanical lysis system (Tissue Lyzer II). Supernatants were  
23 obtained by centrifugation before injection in LC-MS/MS. Samples were analysed using UPLC  
24 system Acquity I Class (Waters), combined with a triple quadrupole mass spectrometer Xevo  
25 TQD (Waters). The column, placed at 40°C, was an Acquity BEH C8 50\*2.1mm, 1.7µm column  
26 (Waters) and the following mobile phases were used: 5mM ammonium formate pH 3.75 in water,  
27 as solvent (A) and 5 mM ammonium formate pH 3,75 in acetonitrile as solvent.

#### 28 **Experimental infection of K18-hACE2 transgenic mice**

29 Eight week-old K18-human ACE2 expressing C57BL/6 mice (B6.Cg-Tg(K18-hACE2)2PrImn/J)  
30 were purchased from the Jackson Laboratory. For infection, mice (both sexes) were  
31 anesthetized by i.p. injection of ketamine (100 mg/kg) and xylazine (10 mg/kg) and then  
32 intranasally infected with 50 µl of DMEM containing (or not, in a mock sample)  $5 \times 10^2$  TCID<sub>50</sub> of  
33 hCoV-19\_IPL\_France strain of SARS-CoV-2 (NCBI MW575140). Clofoctol (62.5 mg/kg in  
34 females and 50 mg/kg in males) was injected i.p. at 1h and 8h post-infection. The treatment was  
35 repeated the day after infection. Mice were sacrificed at day 2 or day 4 post-infection.  
36



## 1 **Determination of viral loads in the lungs of mice**

2 To determine the viral loads in lungs, half of right lobes were homogenized in Lysing Matrix D  
3 tubes (mpbio) containing 1 mL of PBS using Mixer Mill MM 400 (Retsch) (15min – 15 Hz). After  
4 centrifugation at 11,000 rpm for 5 min, the clarified supernatant was harvested for virus  
5 titration. Dilutions of the supernatant were done in DMEM with 1% penicillin/streptomycin and  
6 dilutions were transferred to Vero-E6 cells in 96-well plates for TCID<sub>50</sub> assay. Quantitation of  
7 viral RNA in lung tissue was performed as follows. Briefly, half of the left lobe was homogenized  
8 in 1mL of RA1 buffer from the NucleoSpin RNA kit containing 20 mM of Tris(2-  
9 carboxyethyl)phosphine). Total RNAs in the tissue homogenate were extracted with NucleoSpin  
10 RNA from Macherey Nagel. RNA was eluted with 50µL of water.

11

## 12 **Determination of the viral load and assessment of gene expression by RT-qPCR**

13 Half of the right lobe was homogenized in 1 mL of RA1 buffer from the NucleoSpin RNA kit  
14 containing 20 mM of TCEP. Total RNAs in the tissue homogenate were extracted with  
15 NucleoSpin RNA from Macherey Nagel. RNAs were eluted with 60 µL of water.  
16 RNA was reverse-transcribed with the High-Capacity cDNA Archive Kit (Life Technologies,  
17 USA). The resulting cDNA was amplified using SYBR Green-based real-time PCR and the  
18 QuantStudio™ 12K Flex Real-Time PCR Systems (Applied Biosystems™, USA) following  
19 manufacturers protocol. Relative quantifications were performed using the gene coding for RNA-  
20 dependent RNA polymerase (*RdRp*) and for glyceraldehyde 3-phosphate dehydrogenase  
21 (*Gapdh*). Specific primers were designed using Primer Express software (Applied Biosystems,  
22 Villebon-sur-Yvette, France) and ordered to Eurofins Scientifics (Ebersberg, Germany). The list  
23 of primers is available in Supplementary Table 3. Relative mRNA levels ( $2^{-\Delta\Delta Ct}$ ) were determined  
24 by comparing (a) the PCR cycle thresholds (Ct) for the gene of interest and the house keeping  
25 gene ( $\Delta Ct$ ) and (b)  $\Delta Ct$  values for treated and control groups ( $\Delta\Delta Ct$ ). Data were normalized  
26 against expression of the *gapdh* gene and are expressed as a fold-increase over the mean gene  
27 expression level in mock-treated mice. Viral load is expressed as viral RNA normalized to *Gapdh*  
28 expression level ( $\Delta Ct$ ).

29

## 30 **Lung pathology scoring**

31 Lung tissues were fixed in 4% PBS buffered formaldehyde for 7 days, rinsed in PBS, transferred  
32 in ethanol and then processed into paraffin-embedded tissues blocks. The subcontractor  
33 Sciempath Labo (Larçay, France) performed histological processing and analysis. The tissue  
34 sections in 3 µm were stained with haematoxylin and eosin (H&E) and whole mount tissues were  
35 scanned with a Nanozoomer (Hamatsu) and the morphological changes were assessed by a  
36 semi-quantitative score. For the scoring, a dual histopathology scoring system adapted from  
37 (Imai et al., 2020; Meyerholz and Beck, 2020) was used to assess pulmonary changes in mice.



1 Inflammation was scored as 0 = absent, 1 = 1-10% of lung section, 2 = 11-25% of lung section, 3  
2 = 26-50% of lung section, and 4=>50% of lung section affected.

3

#### 4 **Statistical analysis**

5 Results are expressed as the mean  $\pm$  standard deviation (SD) unless otherwise stated. All  
6 statistical analysis was performed using GraphPad Prism v6 software. A Mann-Whitney *U* test  
7 was used to compare two groups unless otherwise stated. Comparisons of more than two  
8 groups with each other were analyzed with the One-way ANOVA Kruskal-Wallis test  
9 (nonparametric), followed by the Dunn's posttest. \*,  $P < 0.05$ ; \*\*,  $P < 0.01$ ; \*\*\*,  $P < 0.001$ .

10

#### 11 **Ethics and biosafety statement**

12 All experiments involving SARS-CoV-2 were performed within the biosafety level 3 facility of the  
13 Institut Pasteur de Lille, after validation of the protocols by the local committee for the evaluation  
14 of the biological risks and complied with current national and institutional regulations and ethical  
15 guidelines (Institut Pasteur de Lille/B59-350009). The experimental protocols using animals were  
16 approved by the institutional ethical committee "Comité d'Ethique en Experimentation Animale  
17 (CEEAA) 75, Nord Pas-de-Calais". The animal study was authorized by the "Education, Research  
18 and Innovation Ministry" under registration number APAFIS#25517-2020052608325772v3.

19

#### 20 **Acknowledgements**

21 We thank Sylvie van der Werf for sharing the SARS-CoV-2 strain  
22 BetaCoV/France/IDF0372/2020, Volker Thiel for providing HCoV-229E-RLuc and Chiesi for  
23 sharing clofocetol compound. We thank the infrastructure ChemBioFrance and the platforms  
24 ARIADNE-criblage (UMS2014-US41 PLBS) and ARIADNE-ADME to provide access to the  
25 Opera microscope and for LC-MS/MS analysis. Thank are also due to Nathan François for  
26 technical assistance and to Imène Belhaouane, Robin Prath and Nicolas Vandenabele for their  
27 technical help in the BSL3 facility. We are also grateful to Françoise Jacob-Dubuisson for her  
28 helpful comment on the manuscript. The immunofluorescence analyses were performed with the  
29 help of the imaging core facility of the Biolmaging Center Lille Nord-de-France.

30 This work was supported by the Institut Pasteur de Lille, the Fondation pour la Recherche  
31 Médicale (FRM) and the Agence Nationale de la Recherche (ANR) (Project FRM\_ANR Flash 20  
32 ANTICOV), the Centre National de la Recherche Scientifique (CNRS: COVID and ViroCrib  
33 programs) and the I-Site Foundation (I-Site\_Covid20\_ANTI-SARS2). The platform used in this  
34 work was supported by the European Union (ERC-STG INTRACELLTB grant 260901), the ANR  
35 (ANR-10-EQPX-04-01), the "Fonds Européen de Développement Régional" (Feder) (12001407

1 [D-AL] EquipEx ImagInEx BioMed), CPER-CTRL (Centre Transdisciplinaire de Recherche sur la  
2 Longévité) and the Région Nord-Pas-de-Calais (convention 12000080).

3

4 Author contributions: S.B., A.M., V.S., T.V., E.H., N.D., Y.R., Lo.D., A.D., C.R., K.S., L.B., C.M.,  
5 C.P., A.B., A.V., Lu.D., Ju. D. and F.L. designed and/or performed experiments. S.B., A.M., V.S.,  
6 T.V., E.H., N.D., Y.R., Lo.D., K.S., L.B., C.M., A.V., T.B. and S.H. analyzed data. I.E., E.K.A. and  
7 D.H. generated critical reagents. P.B., T.B., F.T., B.D. and Je.D. oversaw the conception and  
8 design of the experiments. S.B., T.V., T.B., F.T., and Je.D. wrote the manuscript.

9

## 10 **Competing interests**

11 European Patent Application Serial No. EP20305633.8, entitled “Compound and method for the  
12 treatment of coronaviruses” related to this work was filed on 10 June 2020. Several authors of  
13 this manuscript are inventors of the patent. The corresponding authors had full access to all the  
14 data in the study and had final responsibility for the decision to submit for publication.

15

## 16 **References**

- 17 Alessandri, M.G., M. Ducci, V. Scalori, R. Danesi, M. Del Tacca, M.C. Bernardini, and L.  
18 Mazzanti. 1986. The pharmacokinetic profile of clofoctol in rat plasma and tissues after  
19 oral and rectal administration. *Drugs Exp. Clin. Res.* 12:343–347.
- 20 Arthi, V., and J. Parman. 2021. Disease, downturns, and wellbeing: Economic history and the  
21 long-run impacts of COVID-19. *Explor. Econ. Hist.* 79:101381.  
22 doi:10.1016/j.eeh.2020.101381.
- 23 Bailly, C., and G. Vergoten. 2021. A new horizon for the old antibacterial drug clofoctol. *Drug*  
24 *Discov. Today.* doi:10.1016/j.drudis.2021.02.004.
- 25 Danesi, R., and M. Del Tacca. 1985. Clinical study on the efficacy of clofoctol in the treatment of  
26 infectious respiratory diseases. *Int. J. Clin. Pharmacol. Res.* 5:175–179.
- 27 Del Tacca, M., R. Danesi, S. Senesi, M. Gasperini, A. Mussi, and C.A. Angeletti. 1987.  
28 Penetration of clofoctol into human lung. *J. Antimicrob. Chemother.* 19:679–683.  
29 doi:10.1093/jac/19.5.679.
- 30 Echavarría-Consuegra, L., G.M. Cook, I. Busnadiego, C. Lefèvre, S. Keep, K. Brown, N. Doyle,  
31 G. Dowgier, K. Franaszek, N.A. Moore, S.G. Siddell, E. Bickerton, B.G. Hale, A.E. Firth,  
32 I. Brierley, and N. Irigoyen. 2021. Manipulation of the unfolded protein response: A  
33 pharmacological strategy against coronavirus infection. *PLOS Pathog.* 17:e1009644.  
34 doi:10.1371/journal.ppat.1009644.
- 35 Eymieux, S., Y. Rouillé, O. Terrier, K. Seron, E. Blanchard, M. Rosa-Calatrava, J. Dubuisson, S.  
36 Belouzard, and P. Roingard. 2021. Ultrastructural modifications induced by SARS-CoV-  
37 2 in Vero cells: a kinetic analysis of viral factory formation, viral particle morphogenesis  
38 and virion release. *Cell. Mol. Life Sci.* doi:10.1007/s00018-020-03745-y.
- 39 Fernandez-Zapico, M.E., G.A. Lomberk, S. Tsuji, C.J. DeMars, M.R. Bardsley, Y.-H. Lin, L.L.  
40 Almada, J.-J. Han, D. Mukhopadhyay, T. Ordog, N.S. Buttar, and R. Urrutia. 2011. A

- 1 functional family-wide screening of SP/KLF proteins identifies a subset of suppressors of  
2 KRAS-mediated cell growth. *Biochem. J.* 435:529–537. doi:10.1042/BJ20100773.
- 3 Ghilardi, P.L., and A. Casani. 1985. Treatment of ear, nose and throat infections with clofocetol.  
4 *Drugs Exp. Clin. Res.* 11:815–818.
- 5 Golden, J.W., C.R. Cline, X. Zeng, A.R. Garrison, B.D. Carey, E.M. Mucker, L.E. White, J.D.  
6 Shamblyn, R.L. Brocato, J. Liu, A.M. Babka, H.B. Rauch, J.M. Smith, B.S. Hollidge, C.  
7 Fitzpatrick, C.V. Badger, and J.W. Hooper. 2020. Human angiotensin-converting enzyme  
8 2 transgenic mice infected with SARS-CoV-2 develop severe and fatal respiratory  
9 disease. *JCI Insight.* 5. doi:10.1172/jci.insight.142032.
- 10 Goueslain, L., K. Alsaleh, P. Horellou, P. Roingeard, V. Descamps, G. Duverlie, Y. Ciczora, C.  
11 Wychowski, J. Dubuisson, and Y. Rouillé. 2010. Identification of GBF1 as a cellular factor  
12 required for hepatitis C virus RNA replication. *J. Virol.* 84:773–787.  
13 doi:10.1128/JVI.01190-09.
- 14 Hoffmann, M., K. Mösbauer, H. Hofmann-Winkler, A. Kaul, H. Kleine-Weber, N. Krüger, N.C.  
15 Gassen, M.A. Müller, C. Drosten, and S. Pöhlmann. 2020. Chloroquine does not inhibit  
16 infection of human lung cells with SARS-CoV-2. *Nature.* doi:10.1038/s41586-020-2575-3.
- 17 Hu, Y., M. Zhang, N. Tian, D. Li, F. Wu, P. Hu, Z. Wang, L. Wang, W. Hao, J. Kang, B. Yin, Z.  
18 Zheng, T. Jiang, J. Yuan, B. Qiang, W. Han, and X. Peng. 2019. The antibiotic clofocetol  
19 suppresses glioma stem cell proliferation by activating KLF13. *J. Clin. Invest.* 129:3072–  
20 3085. doi:10.1172/JCI124979.
- 21 Imai, M., K. Iwatsuki-Horimoto, M. Hatta, S. Loeber, P.J. Halfmann, N. Nakajima, T. Watanabe,  
22 M. Ujie, K. Takahashi, M. Ito, S. Yamada, S. Fan, S. Chiba, M. Kuroda, L. Guan, K.  
23 Takada, T. Armbrust, A. Balogh, Y. Furusawa, M. Okuda, H. Ueki, A. Yasuhara, Y.  
24 Sakai-Tagawa, T.J.S. Lopes, M. Kiso, S. Yamayoshi, N. Kinoshita, N. Ohmagari, S.-I.  
25 Hattori, M. Takeda, H. Mitsuya, F. Krammer, T. Suzuki, and Y. Kawaoka. 2020. Syrian  
26 hamsters as a small animal model for SARS-CoV-2 infection and countermeasure  
27 development. *Proc. Natl. Acad. Sci. U. S. A.* 117:16587–16595.  
28 doi:10.1073/pnas.2009799117.
- 29 Jeon, S., M. Ko, J. Lee, I. Choi, S.Y. Byun, S. Park, D. Shum, and S. Kim. 2020. Identification of  
30 Antiviral Drug Candidates against SARS-CoV-2 from FDA-Approved Drugs. *Antimicrob.*  
31 *Agents Chemother.* 64. doi:10.1128/AAC.00819-20.
- 32 Jiang, S., H. Wei, T. Song, Y. Yang, F. Zhang, Y. Zhou, J. Peng, and S. Jiang. 2015. KLF13  
33 promotes porcine adipocyte differentiation through PPAR $\gamma$  activation. *Cell Biosci.* 5:28.  
34 doi:10.1186/s13578-015-0016-z.
- 35 Lo, M.K., C.G. Albariño, J.K. Perry, S. Chang, E.P. Tchesnokov, L. Guerrero, A. Chakrabarti, P.  
36 Shrivastava-Ranjan, P. Chatterjee, L.K. McMullan, R. Martin, R. Jordan, M. Götte, J.M.  
37 Montgomery, S.T. Nichol, M. Flint, D. Porter, and C.F. Spiropoulou. 2020. Remdesivir  
38 targets a structurally analogous region of the Ebola virus and SARS-CoV-2 polymerases.  
39 *Proc. Natl. Acad. Sci. U. S. A.* 117:26946–26954. doi:10.1073/pnas.2012294117.
- 40 Lu, J., Y. Hou, S. Ge, X. Wang, J. Wang, T. Hu, Y. Lv, H. He, and C. Wang. 2021. Screened  
41 antipsychotic drugs inhibit SARS-CoV-2 binding with ACE2 in vitro. *Life Sci.* 266:118889.  
42 doi:10.1016/j.lfs.2020.118889.
- 43 Matsuyama, S., N. Nao, K. Shirato, M. Kawase, S. Saito, I. Takayama, N. Nagata, T. Sekizuka,  
44 H. Katoh, F. Kato, M. Sakata, M. Tahara, S. Kutsuna, N. Ohmagari, M. Kuroda, T.

- 1 Suzuki, T. Kageyama, and M. Takeda. 2020. Enhanced isolation of SARS-CoV-2 by  
2 TMPRSS2-expressing cells. *Proc. Natl. Acad. Sci. U. S. A.* 117:7001–7003.  
3 doi:10.1073/pnas.2002589117.
- 4 Meyerholz, D.K., and A.P. Beck. 2020. Histopathologic Evaluation and Scoring of Viral Lung  
5 Infection. *Methods Mol. Biol. Clifton NJ.* 2099:205–220. doi:10.1007/978-1-0716-0211-  
6 9\_16.
- 7 Nakabayashi, H., K. Taketa, K. Miyano, T. Yamane, and J. Sato. 1982. Growth of human  
8 hepatoma cells lines with differentiated functions in chemically defined medium. *Cancer*  
9 *Res.* 42:3858–3863.
- 10 Riva, L., S. Yuan, X. Yin, L. Martin-Sancho, N. Matsunaga, L. Pache, S. Burgstaller-  
11 Muehlbacher, P.D. De Jesus, P. Teriete, M.V. Hull, M.W. Chang, J.F.-W. Chan, J. Cao,  
12 V.K.-M. Poon, K.M. Herbert, K. Cheng, T.-T.H. Nguyen, A. Rubanov, Y. Pu, C. Nguyen,  
13 A. Choi, R. Rathnasinghe, M. Schotsaert, L. Miorin, M. Dejosez, T.P. Zwaka, K.-Y. Sit, L.  
14 Martinez-Sobrido, W.-C. Liu, K.M. White, M.E. Chapman, E.K. Lendy, R.J. Glynne, R.  
15 Albrecht, E. Ruppin, A.D. Mesecar, J.R. Johnson, C. Benner, R. Sun, P.G. Schultz, A.I.  
16 Su, A. García-Sastre, A.K. Chatterjee, K.-Y. Yuen, and S.K. Chanda. 2020. Discovery of  
17 SARS-CoV-2 antiviral drugs through large-scale compound repurposing. *Nature.*  
18 586:113–119. doi:10.1038/s41586-020-2577-1.
- 19 Shaban, M.S., C. Müller, C. Mayr-Buro, H. Weiser, J. Meier-Soelch, B.V. Albert, A. Weber, U.  
20 Linne, T. Hain, I. Babayev, N. Karl, N. Hofmann, S. Becker, S. Herold, M.L. Schmitz, J.  
21 Ziebuhr, and M. Kracht. 2021. Multi-level inhibition of coronavirus replication by chemical  
22 ER stress. *Nat. Commun.* 12:5536. doi:10.1038/s41467-021-25551-1.
- 23 Song, O.-R., N. Deboosere, V. Delorme, C.J. Queval, G. Deloison, E. Werkmeister, F. Lafont, A.  
24 Baulard, R. Iantomasi, and P. Brodin. 2017. Phenotypic assays for Mycobacterium  
25 tuberculosis infection. *Cytom. Part J. Int. Soc. Anal. Cytol.* 91:983–994.  
26 doi:10.1002/cyto.a.23129.
- 27 Wang, M., R. Cao, L. Zhang, X. Yang, J. Liu, M. Xu, Z. Shi, Z. Hu, W. Zhong, and G. Xiao. 2020.  
28 Remdesivir and chloroquine effectively inhibit the recently emerged novel coronavirus  
29 (2019-nCoV) in vitro. *Cell Res.* 30:269–271. doi:10.1038/s41422-020-0282-0.
- 30 Wang, M., J.S. Shim, R.-J. Li, Y. Dang, Q. He, M. Das, and J.O. Liu. 2014a. Identification of an  
31 old antibiotic clofocetol as a novel activator of unfolded protein response pathways and an  
32 inhibitor of prostate cancer. *Br. J. Pharmacol.* 171:4478–4489. doi:10.1111/bph.12800.
- 33 Wang, Y., J. Li, M. Sun, B. Ni, C. Huan, L. Huang, C. Li, H. Fan, X. Ren, and X. Mao. 2014b.  
34 Triggering unfolded protein response by 2-Deoxy-D-glucose inhibits porcine epidemic  
35 diarrhea virus propagation. *Antiviral Res.* 106:33–41. doi:10.1016/j.antiviral.2014.03.007.
- 36 Weston, S., C.M. Coleman, R. Haupt, J. Logue, K. Matthews, Y. Li, H.M. Reyes, S.R. Weiss,  
37 and M.B. Frieman. 2020. Broad Anti-coronavirus Activity of Food and Drug  
38 Administration-Approved Drugs against SARS-CoV-2 In Vitro and SARS-CoV In Vivo. *J.*  
39 *Virol.* 94. doi:10.1128/JVI.01218-20.
- 40 WHO Solidarity Trial Consortium, H. Pan, R. Peto, A.-M. Henao-Restrepo, M.-P. Preziosi, V.  
41 Sathiyamoorthy, Q. Abdool Karim, M.M. Alejandria, C. Hernández García, M.-P. Kieny,  
42 R. Malekzadeh, S. Murthy, K.S. Reddy, M. Roses Periago, P. Abi Hanna, F. Ader, A.M.  
43 Al-Bader, A. Alhasawi, E. Allum, A. Alotaibi, C.A. Alvarez-Moreno, S. Appadoo, A. Asiri,  
44 P. Aukrust, A. Barratt-Due, S. Bellani, M. Branca, H.B.C. Cappel-Porter, N. Cerrato, T.S.  
45 Chow, N. Como, J. Eustace, P.J. García, S. Godbole, E. Gotuzzo, L. Griskevicius, R.

- 1 Hamra, M. Hassan, M. Hassany, D. Hutton, I. Irmansyah, L. Jancoriene, J. Kirwan, S.  
2 Kumar, P. Lennon, G. Lopardo, P. Lydon, N. Magrini, T. Maguire, S. Manevska, O.  
3 Manuel, S. McGinty, M.T. Medina, M.L. Mesa Rubio, M.C. Miranda-Montoya, J. Nel, E.P.  
4 Nunes, M. Perola, A. Portolés, M.R. Rasmin, A. Raza, H. Rees, P.P.S. Reges, C.A.  
5 Rogers, K. Salami, M.I. Salvadori, N. Sinani, J.A.C. Sterne, M. Stevanovikj, E. Tacconelli,  
6 K.A.O. Tikkinen, S. Trelle, H. Zaid, J.-A. Røttingen, and S. Swaminathan. 2021.  
7 Repurposed Antiviral Drugs for Covid-19 - Interim WHO Solidarity Trial Results. *N. Engl.*  
8 *J. Med.* 384:497–511. doi:10.1056/NEJMoa2023184.
- 9 Xue, M., F. Fu, Y. Ma, X. Zhang, L. Li, L. Feng, and P. Liu. 2018. The PERK Arm of the  
10 Unfolded Protein Response Negatively Regulates Transmissible Gastroenteritis Virus  
11 Replication by Suppressing Protein Translation and Promoting Type I Interferon  
12 Production. *J. Virol.* 92. doi:10.1128/JVI.00431-18.
- 13 Yablonsky, F. 1983. Alteration of membrane permeability in *Bacillus subtilis* by clofoctol. *J. Gen.*  
14 *Microbiol.* 129:1089–1095. doi:10.1099/00221287-129-4-1089.
- 15 Yablonsky, F., and G. Simonnet. 1982. Action of clofoctol on bacterial cell wall synthesis. *J.*  
16 *Pharmacol.* 13:515–524.
- 17 Yuan, S., X. Yin, X. Meng, J.F.-W. Chan, Z.-W. Ye, L. Riva, L. Pache, C.C.-Y. Chan, P.-M. Lai,  
18 C.C.-S. Chan, V.K.-M. Poon, A.C.-Y. Lee, N. Matsunaga, Y. Pu, C.-K. Yuen, J. Cao, R.  
19 Liang, K. Tang, L. Sheng, Y. Du, W. Xu, C.-Y. Lau, K.-Y. Sit, W.-K. Au, R. Wang, Y.-Y.  
20 Zhang, Y.-D. Tang, T.M. Clausen, J. Pihl, J. Oh, K.-H. Sze, A.J. Zhang, H. Chu, K.-H.  
21 Kok, D. Wang, X.-H. Cai, J.D. Esko, I.F.-N. Hung, R.A. Li, H. Chen, H. Sun, D.-Y. Jin, R.  
22 Sun, S.K. Chanda, and K.-Y. Yuen. 2021. Clofazimine broadly inhibits coronaviruses  
23 including SARS-CoV-2. *Nature.* doi:10.1038/s41586-021-03431-4.
- 24



## 1 Figures

a

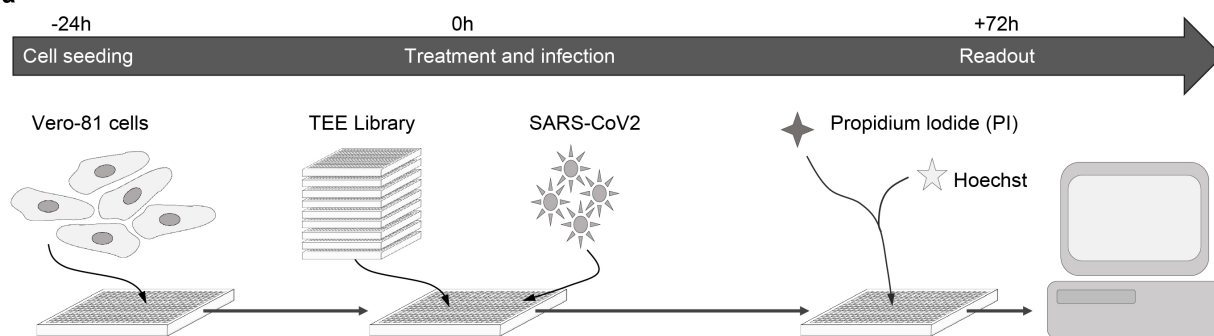

b

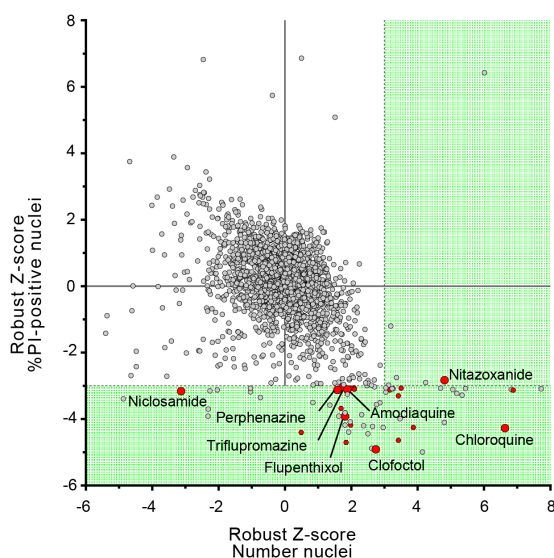

c

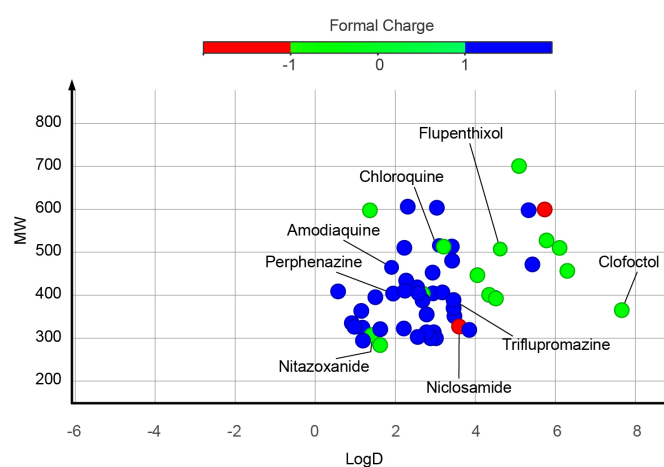

2  
3  
4  
5

6 **Figure 1: HCS screen of Apteous TEELibrary® for the identification of anti-SARS-CoV-2**  
7 **compounds.** a, Workflow overview of the screening process. b, Dot-plot representations of all  
8 compounds tested based on their Robust-Z-score for both the numbers of nuclei and the percentages  
9 of PI-positive nuclei. Dotted lines are indicative of the thresholds chosen for hit selectivity (within the  
10 green area). c, Dot-plot representation according to the molecular weight and the LogD of the  
11 compounds of of interests. Dots are color-coded based on the ionization state at physiological pH.



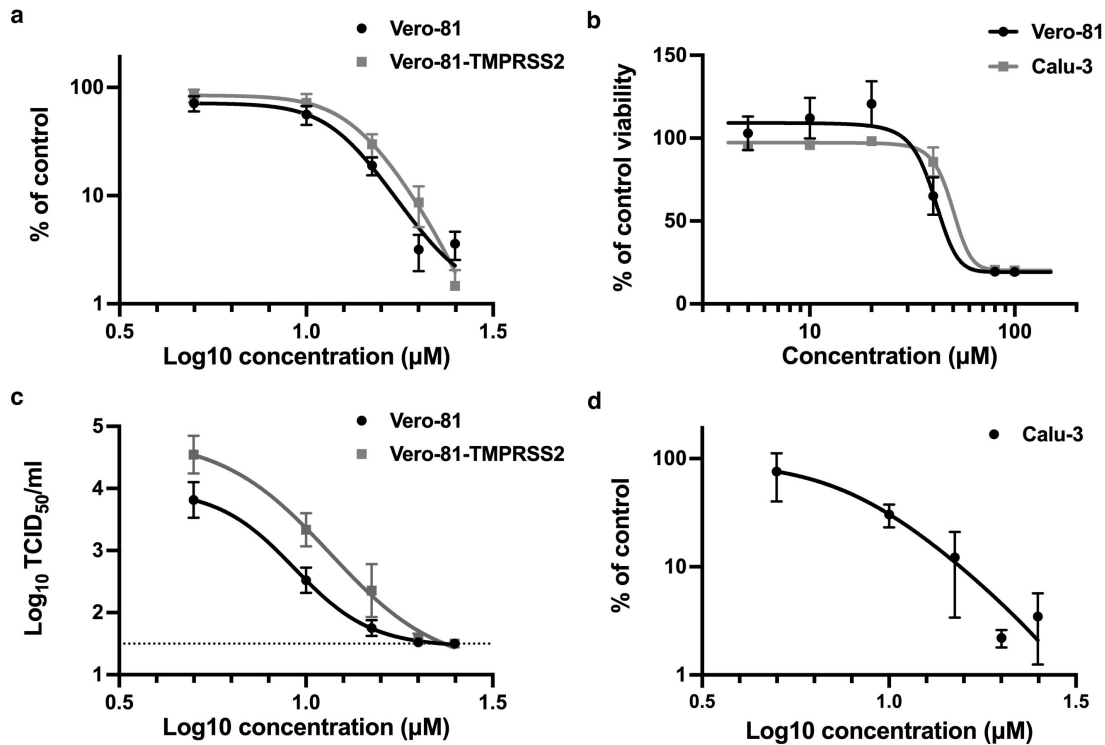

1  
2  
3  
4  
5  
6  
7  
8  
9  
10  
11  
12  
13  
14  
15  
16  
17  
18  
19  
20  
21  
22  
23  
24  
25

**Figure 2: In vitro validation of the antiviral activity of clofoctol.** **a**, Clofoctol inhibits the genomic replication of SARS-CoV-2. Vero-81 and Vero-81-TMPRSS2 cells were infected for 6h at an MOI of 0.25 in the presence of increasing concentrations of clofoctol. Then, total RNA was extracted and viral RNA was quantified by RT-qPCR and normalized by the amount of total RNA. Results are presented as the percentage of the viral load of the control and represent the average of seven independent experiments performed in duplicates. Error bars represent the standard error of the mean (SEM). **b**, Clofoctol is not cytotoxic in cell culture at concentrations below 40 µM. Vero-81 cells and Calu-3 cells were cultured in the presence of given concentrations of clofoctol. Cell viability was monitored using the MTS-based viability assay after 24 hours of incubation. **c**, Clofoctol inhibits the production of progeny virions. Vero-81 and Vero-81-TMPRSS2 cells were infected with SARS-CoV-2 at a MOI of 0.25. After 1h, the inoculum was removed and the cells were washed with PBS prior treatment with clofoctol. Cells were then further incubated for 16h. Thereafter, supernatants were collected and the amounts of secreted infectious virus were quantified. The dotted-line represents the limit of detection (1.5 TCID<sub>50</sub>/mL). These data represent the average of three independent experiments (N=3). Experiments were performed in duplicate for each condition. **d**, Clofoctol inhibits SARS-CoV-2 replication in Calu-3 cells. Calu-3 cells were infected at a MOI of 0.25 in the presence of increasing concentrations of clofoctol for 24h. Then, total cellular RNA was extracted and viral RNA was quantified by RT-qPCR. Results are presented as the percentage of the viral load of the control and represent the average of three independent experiments performed in duplicates. Error bars represent the standard error of the mean (SEM)

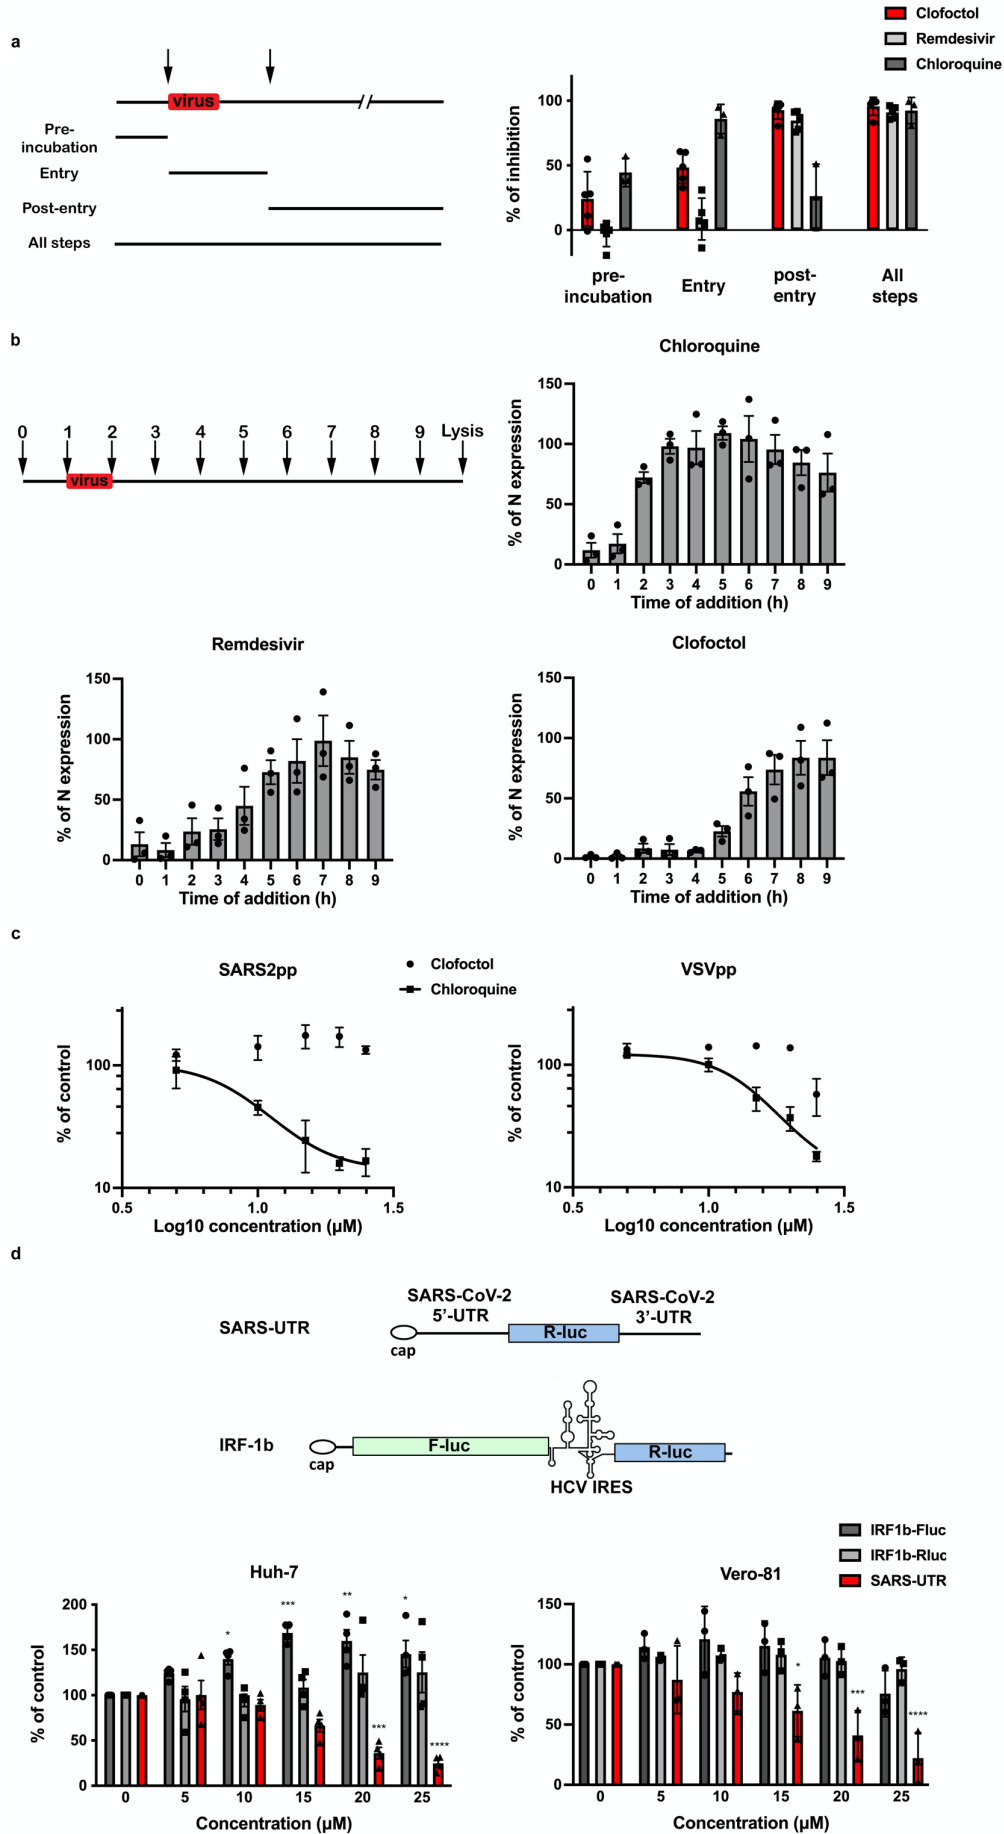

1  
2  
3  
4  
5  
6  
7  
8  
9  
10  
11  
12  
13  
14  
15  
16  
17  
18  
19  
20  
21  
22  
23  
24  
25  
26  
27  
28  
29  
30  
31  
32  
33  
34

**Figure 3: Clofoctol targets the translation step of SARS-CoV-2 life cycle.** Clofoctol targets the translation step of SARS-CoV-2 life cycle. **a**, Clofoctol is mainly efficient at a post-entry step. Vero-81 cells were infected with SARS-CoV-2 at an MOI of 0.25. Clofoctol, remdesivir or CQ were added at a concentration of 15  $\mu$ M either before infection, during virus entry, post-inoculation or throughout the steps as indicated. At 16h post-infection, cells were fixed with 4% paraformaldehyde and processed to detect the proportion of infected cells. Therefore, they were immunostained to allow for the detection of the viral double-stranded RNA and nuclei were detected by Hoechst staining to count the total number of cells. Results are presented as the percentage of infection inhibition and represent the average of five independent experiments. **b**, Time-of-addition experiment. Vero-81 cells were infected at an MOI of 0.5 for 1h. 15  $\mu$ M of clofoctol, remdesivir or CQ were added every hour starting 1h before inoculation. Cells were lysed 8h after the end of the inoculation in Laemmli loading buffer and the amount of N protein was detected in immunoblot. Results are presented as the percentage of N protein expression relative to that in non-treated cells (CTL) and represent the average of three independent experiments. Error bars represent the standard error of the mean (SEM). **c**, Clofoctol does not inhibit SARS-CoV-2 entry. Huh-7 cells expressing ACE2 receptor were infected with SARS2pp or pseudoparticles containing the envelope glycoprotein of the vesicular stomatitis virus (VSV) used as a control (VSVpp) for 3 hours in the presence of increasing concentrations of clofoctol or CQ. At 48 hours post-infection, cells were lysed to quantify luciferase activity. The results are expressed in % of the controls of three independent experiments. The experiments were performed in triplicate (n=3) (in each condition). **d**, Clofoctol inhibits viral RNA translation. Schematic representation of the reporter construct expressing the *Renilla* luciferase placed between the 5'-UTR and the 3'-UTR of the SARS-CoV-2 genomic RNA and the control bicistronic construct containing the firefly luciferase sequence under the control of a cap structure, followed by the *Renilla* luciferase under the control of hepatitis C virus (HCV) IRES. Huh-7 or Vero-81 cells were electroporated with *in vitro* transcribed RNA. Cells were lysed after 8h and luciferase activities were recorded. The results are expressed in % of the controls of three independent experiments. The experiments were performed in quadruplicate (n=4)(in each condition). Two-way ANOVA followed by the Dunnett's multiple comparisons test was performed for statistical analysis (\*p < 0.05; \*\*p < 0.01; \*\*\*p < 0.001).

1  
2

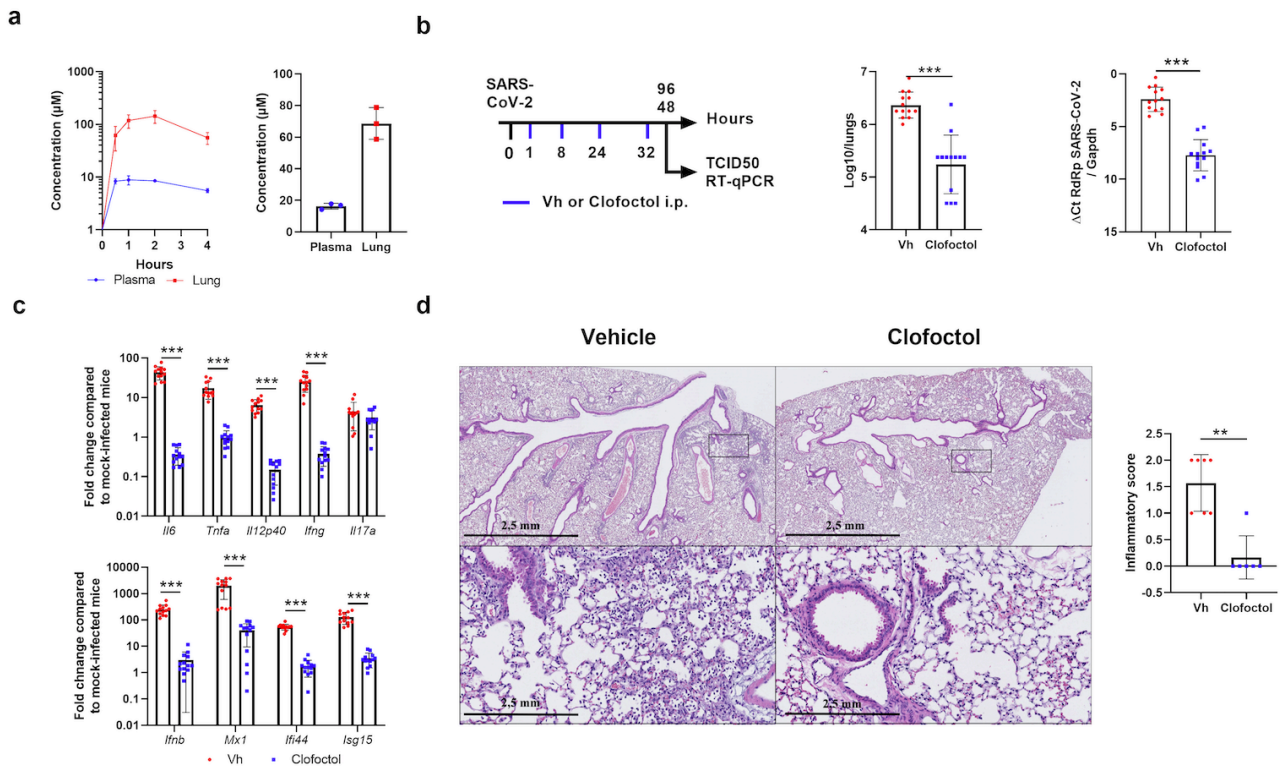

3  
4

**Figure 4: Pharmacokinetics and antiviral properties of clofoctol in a mouse model of COVID-19.** **a**, Pharmacokinetics characterization of clofoctol in mice. *Left panel*, 8-10 week-old female C57BL/6J mice were treated i.p. with a single dose of clofoctol (62.5mg/kg) and were sacrificed at different time points thereafter. *Right panel*, Clofoctol was inoculated twice daily during two days and mice were sacrificed 1h after the last injection. Clofoctol concentrations in lungs (n=3/time point, 3 samples/lung) and plasma (n=3/time point, 2 technical replicates) are depicted. **b-d**, Effects of clofoctol treatment on SARS-CoV-2 infection in K18-hACE2 transgenic C57BL/6J mice. **b**, *Left panel*, Scheme of the experimental design in which the effects of clofoctol was assessed in mice. Mice were treated i.p. with clofoctol (62.5mg/kg) or vehicle 1h and 8h after i.n. inoculation of SARS-CoV-2 (5x10<sup>2</sup> TCID<sub>50</sub> per mouse) and treated again twice at day 1 post-infection. Animals were sacrificed at day 2 and day 4 post-infection. The viral load was determined by titration on Vero-E6 cells (*middle panel*) and by RT-qPCR (*right panel*) (day 2 post-infection). **c**, mRNA copy numbers of genes were quantified by RT-qPCR. Data are expressed as fold change over average gene expression in mock-treated (uninfected) animals (day 2 post-infection). **d**, Lung sections were analyzed at day 4 post-infection. Shown are representative lungs (hematoxylin and eosin staining). *Lower panels*, enlarged views of the area circled in black in *upper panels*. Blinded sections were scored for levels of pathological severity. The inflammatory score is depicted. **b-c**, Results are expressed as the mean ± SD (n=13 for panels **b** and **c** and n=6-7 for panel **d**). Significant differences were determined using the Mann-Whitney U test (\*\*p < 0.01; \*\*\*p < 0.001).

25  
26  
27

1 **Supplementary Table S1**

2 **Multi-parametric script used in Columbus (version 2.3.1, PerkinElmer) for the determination of the**  
 3 **percentage of PI+ Nuclei (PI-positive nuclei related to Fig. 1b).**

| <b>Input Image</b>                     | <b>Stack Processing:</b><br>Individual Planes<br><b>Flat field Correction:</b><br>None                                                                                                                                                                                                                                                                                                                                                | <b>Method</b>                                                                                                                                                                         | <b>Output</b>                                      |
|----------------------------------------|---------------------------------------------------------------------------------------------------------------------------------------------------------------------------------------------------------------------------------------------------------------------------------------------------------------------------------------------------------------------------------------------------------------------------------------|---------------------------------------------------------------------------------------------------------------------------------------------------------------------------------------|----------------------------------------------------|
| <b>Calculate Image</b>                 |                                                                                                                                                                                                                                                                                                                                                                                                                                       | <b>Method</b> : By Formula<br>Formula : iif(A>100,A,0)<br>Channel A : Exp1Cam1<br>Negative Values : Set to Zero<br>Undefined Values : Set to Local Average                            | Output Image :<br>Hoechst Mask                     |
| <b>Find Nuclei</b>                     | Channel : Hoechst Mask<br>ROI : None                                                                                                                                                                                                                                                                                                                                                                                                  | Method : C<br>Common Threshold : <u>0.1</u><br>Area : > 5 $\mu\text{m}^2$<br>Splitting Coefficient : 9<br>Individual Threshold : 0<br>Contrast : > -1                                 | Output Population :<br>Nuclei                      |
| <b>Select Population</b>               | Population : Nuclei                                                                                                                                                                                                                                                                                                                                                                                                                   | Method : Common Filters<br>Remove Border Objects<br>Region : Nucleus                                                                                                                  | Output Population :<br>Hoechst+ Nuclei preSelected |
| <b>Calculate Morphology Properties</b> | Population : Hoechst+ Nuclei preSelected<br>Region : Nucleus                                                                                                                                                                                                                                                                                                                                                                          | Method : Standard<br>Area<br>Roundness                                                                                                                                                | Output Properties :<br>Hoechst+ Nuclei preSelected |
| <b>Select Population</b>               | Population : Hoechst+ Nuclei preSelected                                                                                                                                                                                                                                                                                                                                                                                              | Method : Filter by Property<br>Hoechst+ Nuclei preSelected Area [px <sup>2</sup> ] : >= 35<br>Hoechst+ Nuclei preSelected Roundness : >= <u>0.5</u><br>Boolean Operations : F1 and F2 | Output Population :<br><b>Hoechst+ Nuclei</b>      |
| <b>Calculate Intensity Properties</b>  | Channel : Exp1Cam2<br>Population : <b>Hoechst+ Nuclei</b><br>Region : Nucleus                                                                                                                                                                                                                                                                                                                                                         | <b>Method</b> : Standard<br>Mean                                                                                                                                                      | Output Image :<br>PI Intensity Nucleus             |
| <b>Select Population</b>               | Population : <b>Hoechst+ Nuclei</b>                                                                                                                                                                                                                                                                                                                                                                                                   | Method : Filter by Property<br>PI Intensity Nucleus Mean : 65                                                                                                                         | Output Population :<br><b>PI+ Nuclei</b>           |
| <b>Select Population</b>               | Population : <b>Hoechst+ Nuclei</b>                                                                                                                                                                                                                                                                                                                                                                                                   | Method : Filter by Property<br>PI Intensity Nucleus Mean : 65                                                                                                                         | Output Population :<br><b>PI- Nuclei</b>           |
| <b>Define Results</b>                  | Method : List of Outputs<br>Population : <b>Hoechst+ Nuclei</b><br>Number of Objects<br>Population : <b>PI+ Nuclei</b><br>Number of Objects<br>Population : <b>PI- Nuclei</b><br>Number of Objects<br>Method : Formula Output<br>Formula : a/b*100<br>Population Type : Objects<br>Variable A : <b>PI+ Nuclei</b> - Number of Objects<br>Variable B : <b>Hoechst+ Nuclei</b> - Number of Objects<br>Output Name : % <b>PI+ Nuclei</b> |                                                                                                                                                                                       |                                                    |



1  
2  
3  
4  
5  
6  
7  
8  
9  
10  
11  
12  
13  
14  
15

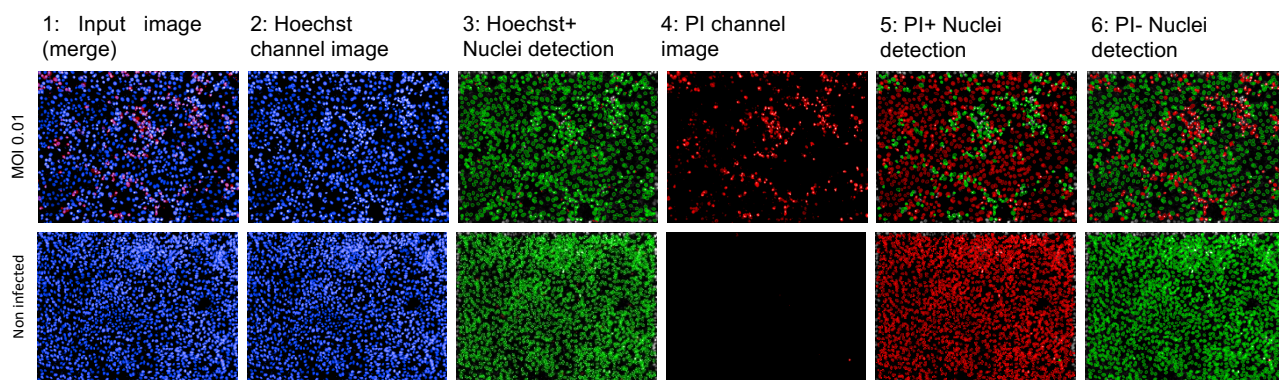

b

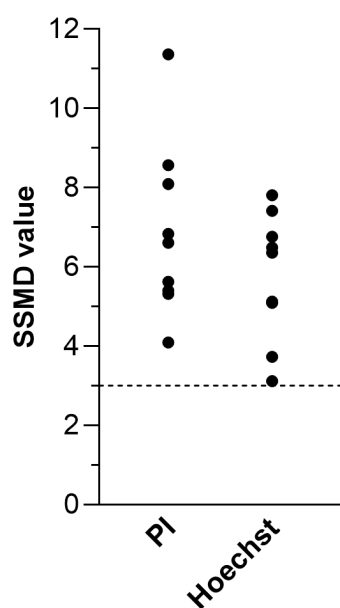

16  
17  
18  
19  
20  
21  
22  
23  
24  
25  
26  
27  
28  
29  
30  
31  
32  
33  
34  
35  
36

**Figure S1: a**, Typical images of Vero-81 cells infected with SARS-Cov-2 (top panel: MOI=0.01) or not (lower panel: Non-infected) acquired on an OPERA™ High Content Screening System (PerkinElmer) and corresponding image segmentation. 1: Typical 2-color images (Blue: Hoechst label, Red: PI-label); 2 and 4: 1-color images corresponding respectively to Hoechst and PI channel images; 3: Filled green objects correspond to total segmented nuclei, 5: Filled green objects correspond to PI positive cells or dead segmented cells, 6: Circled green cells correspond to non-infected cells. **b** SSMD values for HCS screen of the Apteus TEELibrary® for the identification of anti-SARS-CoV-2 compounds. SSMD values were calculated for each of the 9 plates by comparing mean and standard deviations on both negative (Mock) and positive (Infected) controls. Dotted-line is indicative of a threshold of 3 allowing for the validation of the plates. SSMDs were calculated for both readouts.



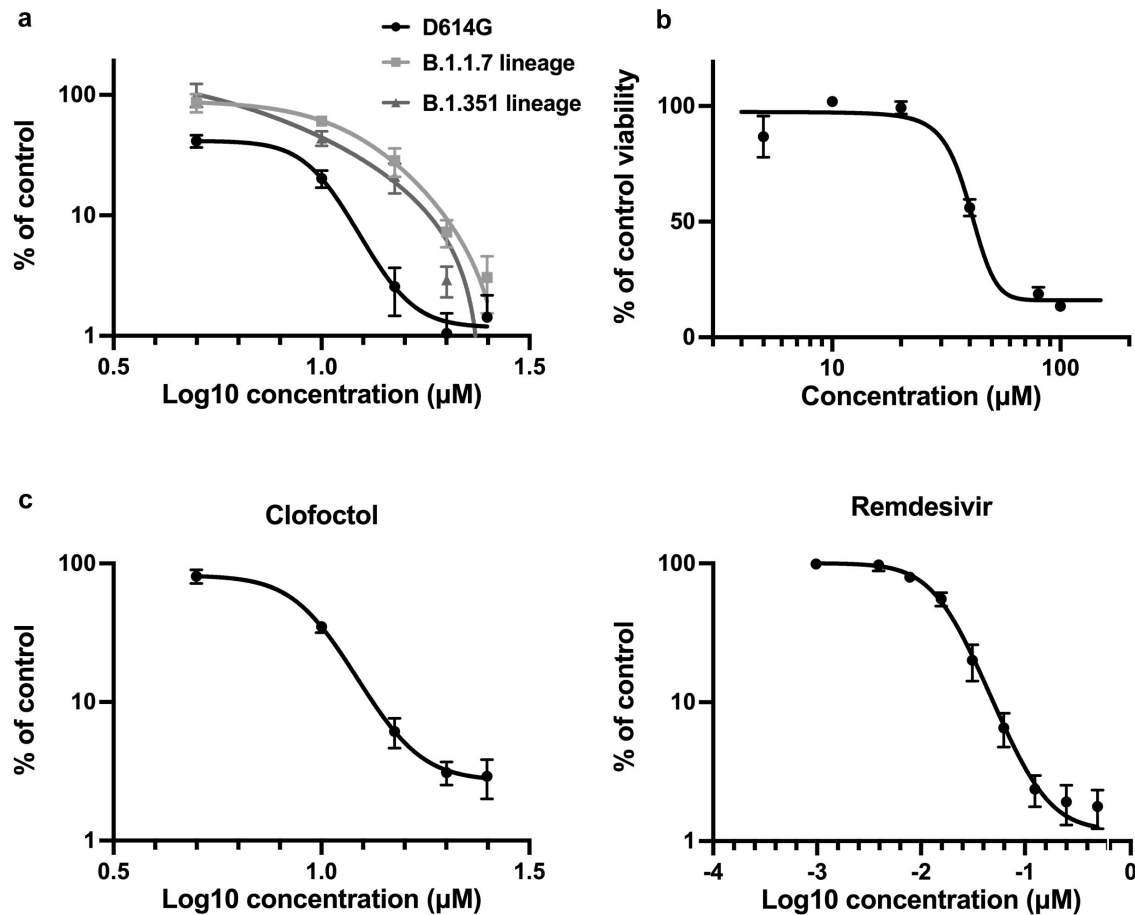

1  
2 **Figure S2: Clofoctol inhibits other SARS-CoV-2 variants as well as HCoV-229E.** a, Vero-81  
3 cells were infected either with SARS-CoV-2 of lineage B1 containing the D614G mutation  
4 (SARS-CoV-2/human/FRA/Lille\_Vero-TMPRSS2/2020) or with SARS-CoV-2 of lineage B1.1.7  
5 (GISAID accession number EPI\_ISL\_1653931) or lineage B.1.351 (GISAID accession number  
6 EPI\_ISL\_1653932). Viral genomes were quantified by RT-qPCR and normalized by the amount  
7 of total RNA. Results are presented as the percentage of the viral load of the control and  
8 represent the average of three independent experiments performed in duplicates. Error bars  
9 represent the standard error of the mean (SEM). b, Clofoctol is not cytotoxic in cell culture at  
10 concentrations below 40  $\mu\text{M}$ . Huh-7 cells were cultured in the presence of given concentrations  
11 of clofoctol. Cell viability was monitored using the MTS-based viability assay after 24 hours of  
12 incubation. c, Huh-7 cells were infected with HCoV-229E-Rluc in presence of different  
13 concentrations of clofoctol or remdesivir. At 7h post-infection, cells were lysed and luciferase  
14 activities were quantified. Results are presented as the percentages of the control and represent  
15 an average of three independent experiments performed in triplicates. Errors bars represent the  
16 standard error of the mean (SEM).  
17

1  
2

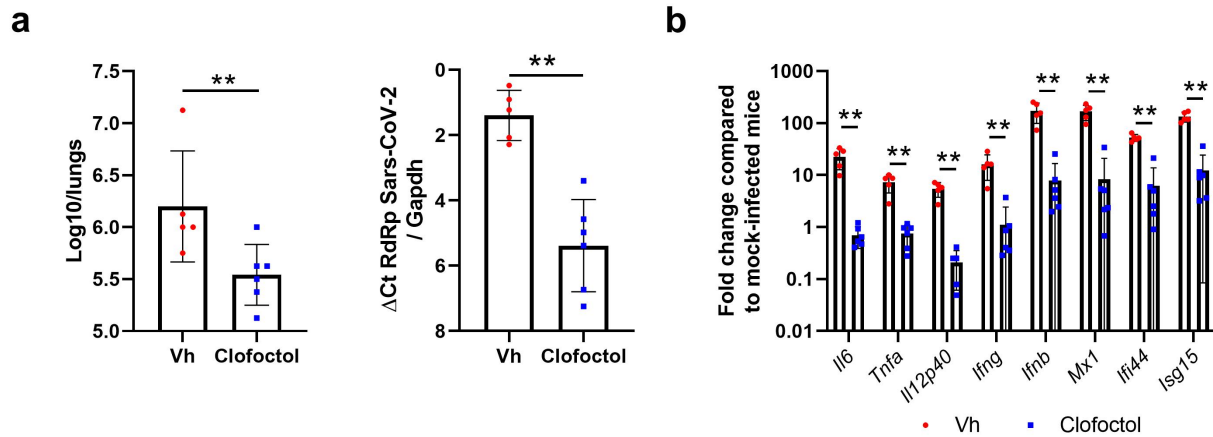

3  
4  
5  
6  
7  
8  
9  
10  
11  
12

**Figure S3: Effects of clofocetol treatment in male K18-hACE2 transgenic mice. a and b,** Male mice were treated (50 mg/kg of clofocetol) and infected as described in Figure 4b. Mice were sacrificed at day 2 post-infection. **a**, The viral load was determined by titration on Vero-E6 cells (*left panel*) and by RT-qPCR (*right panel*). **b**, mRNA copy numbers of genes were quantified by RT-qPCR. Data are expressed as fold change over average gene expression in mock-treated (uninfected) animals. Results are expressed as the mean  $\pm$  SD (n=5-6). Significant differences were determined using the Mann-Whitney U test (\*\*p < 0.01).

1  
2

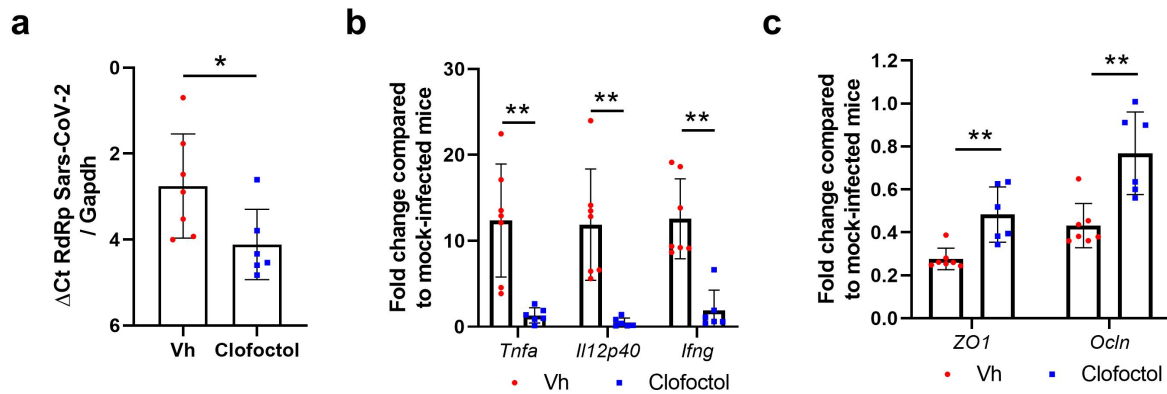

**Figure S4: Effects of clofoctol treatment in female K18-hACE2 transgenic mice at day 4 post-infection.** **a** and **b**, Female mice were treated and infected as described in Figure 4b. Mice were sacrificed at day 4 post-infection. mRNA copy numbers of genes were quantified by RT-qPCR. Panel **a** include inflammatory genes and panel **b** include genes involved in barrier function. Data are expressed as fold change over average gene expression in mock-treated (uninfected) animals. Results are expressed as the mean  $\pm$  SD (n=6-7). Significant differences were determined using the Mann-Whitney U test (\*p < 0.05; \*\*p < 0.01).
